# Supplementary material for: Mobile element insertions and associated structural variants in longitudinal breast cancer samples
Source: PubMed Central journal article supplement (PMC8219704; doi:10.1038/s41598-021-92444-0), 2021-06-22
Supplement: 41598_2021_92444_MOESM1_ESM.pdf [file 41598_2021_92444_MOESM1_ESM.pdf]

a.

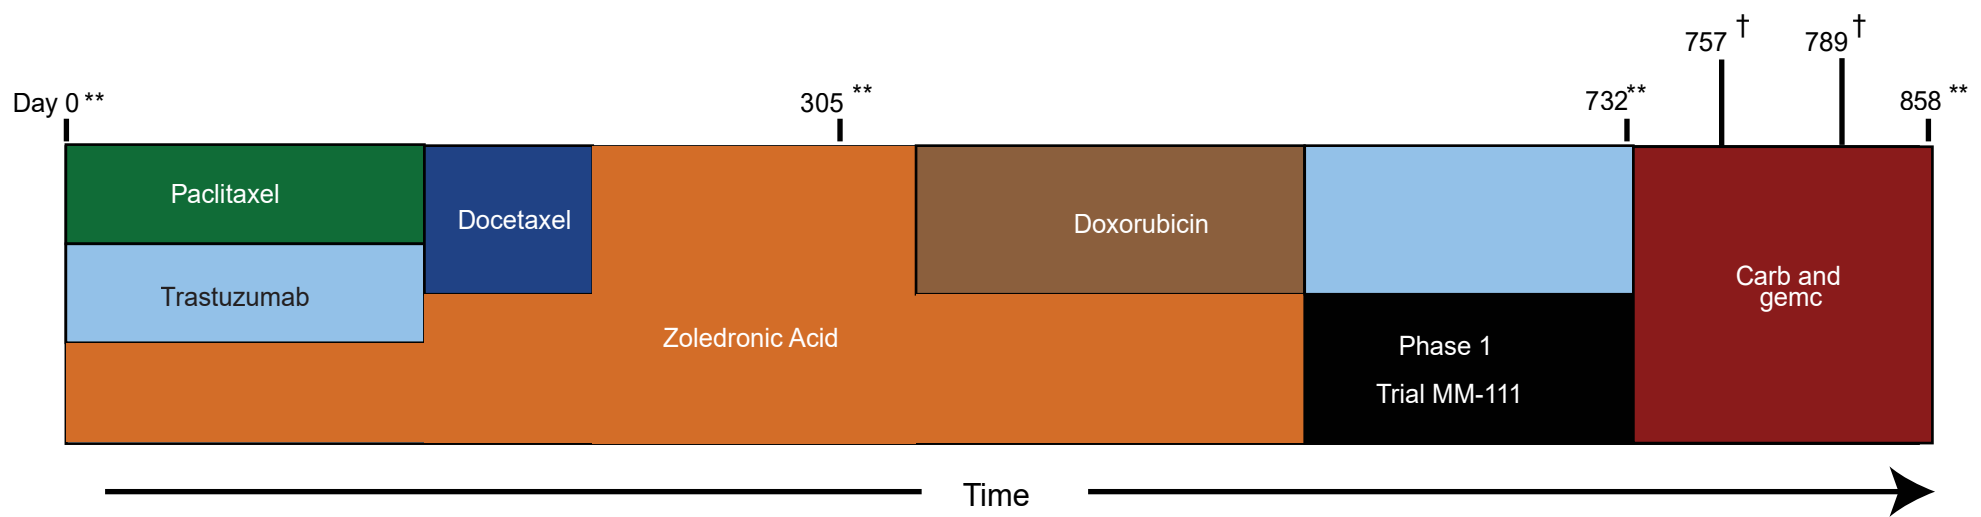

b.

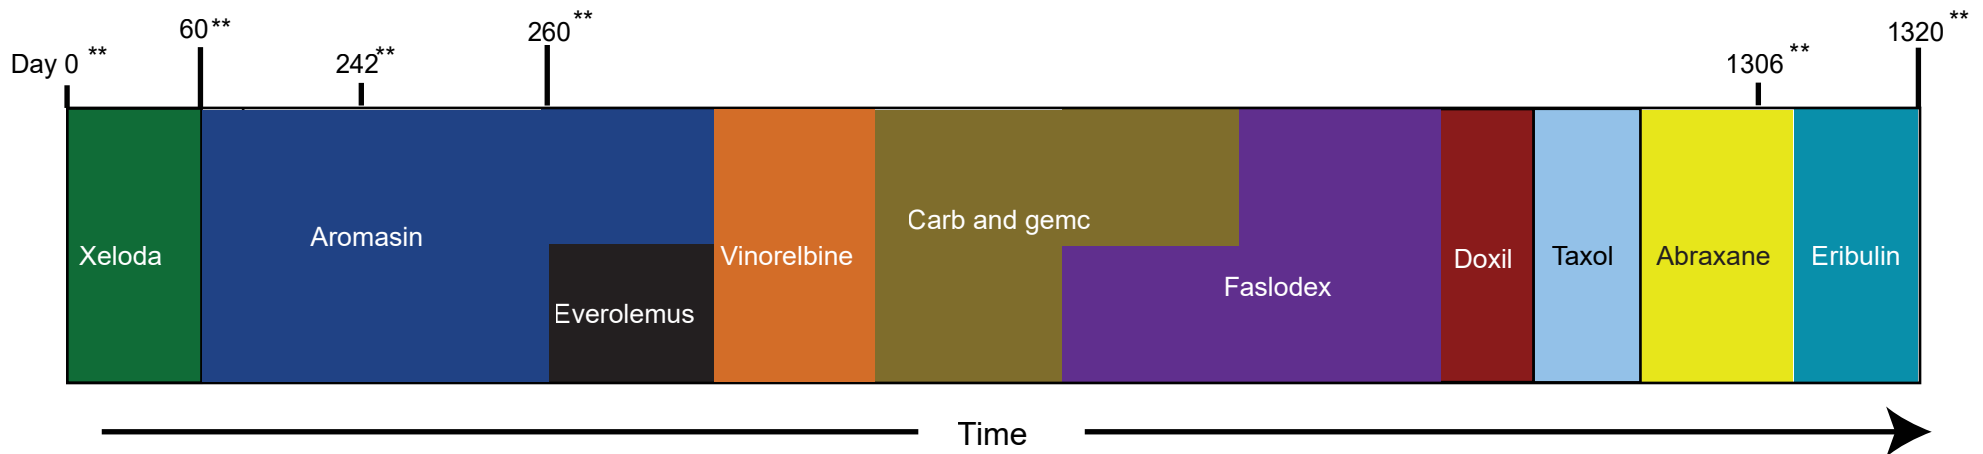

c.

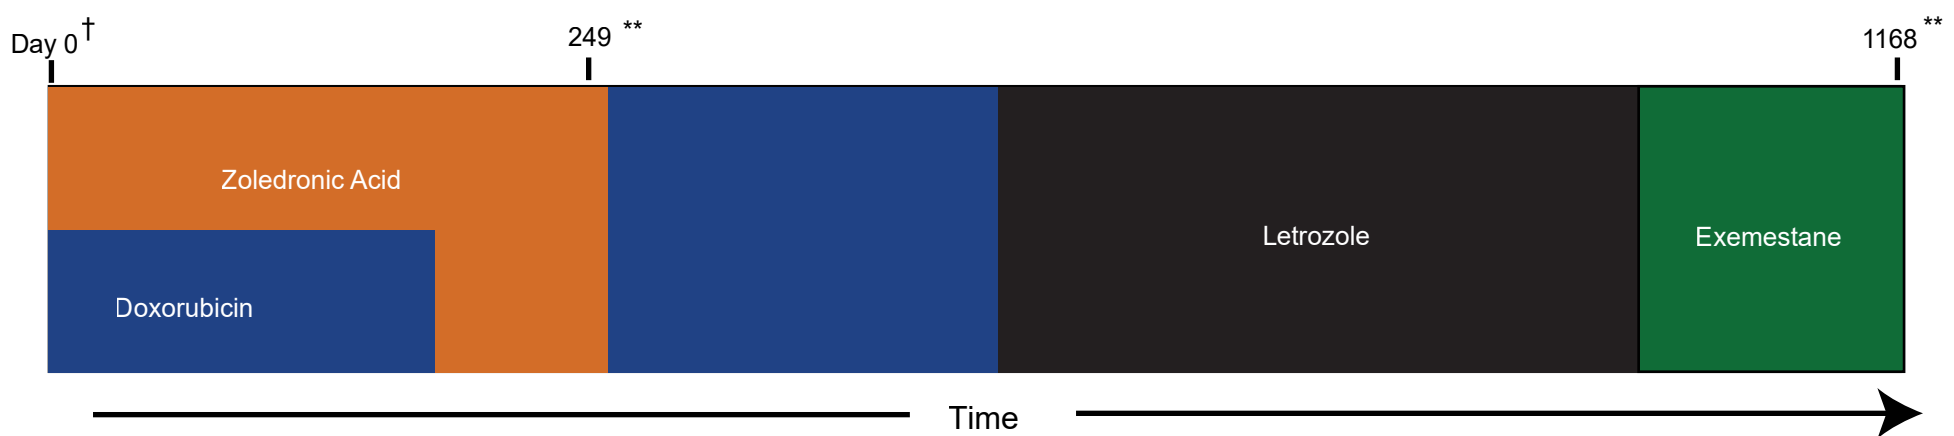

d.

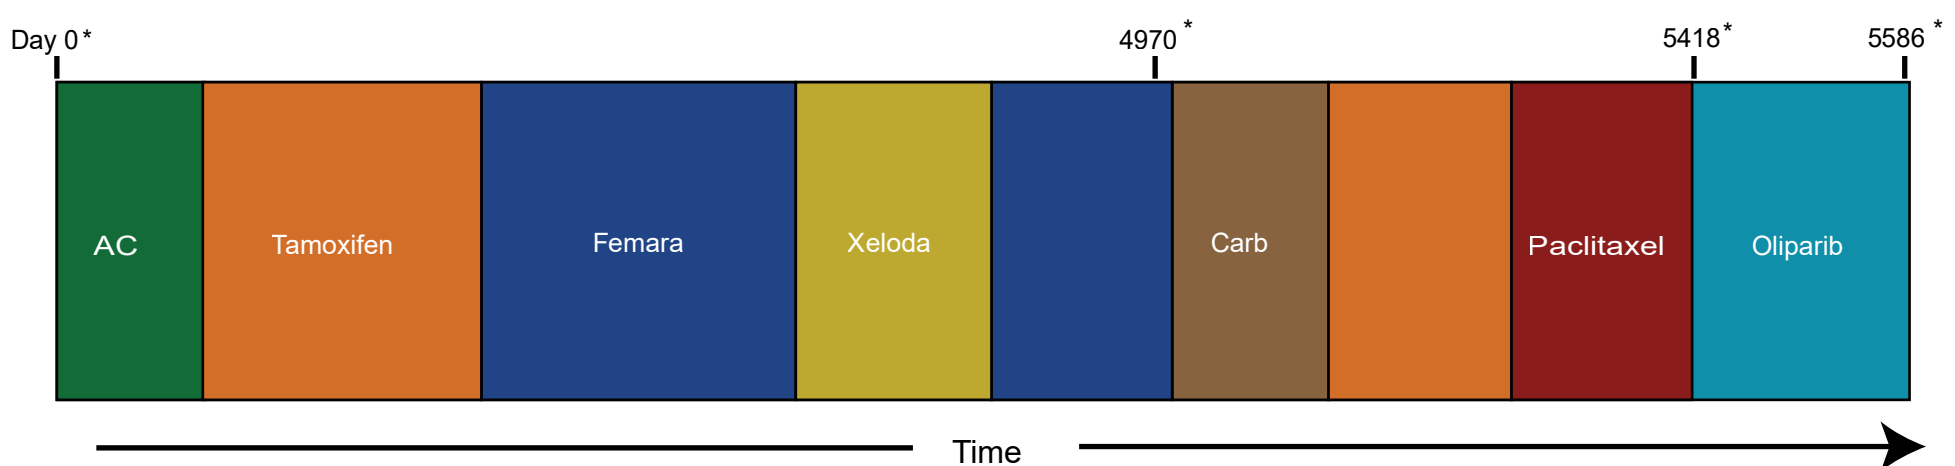

Supplemental Figure 1. Outline of patient treatment information. Parts A-D correspond with patients 1-4, respectively. Each medication or treatment is identified by a colored box. If a treatment was used more than once, a box of the same color is used without a label in that patient to represent the same treatment. The length of the box approximates the duration of each treatment. If multiple treatments overlapped, the boxes are stacked through the timepoints for which they overlapped. The timepoint of each sampling event is shown on the top of the box in days after the first sampling timepoint. \*= DNA, \*\*= DNA and RNA, †= RNA

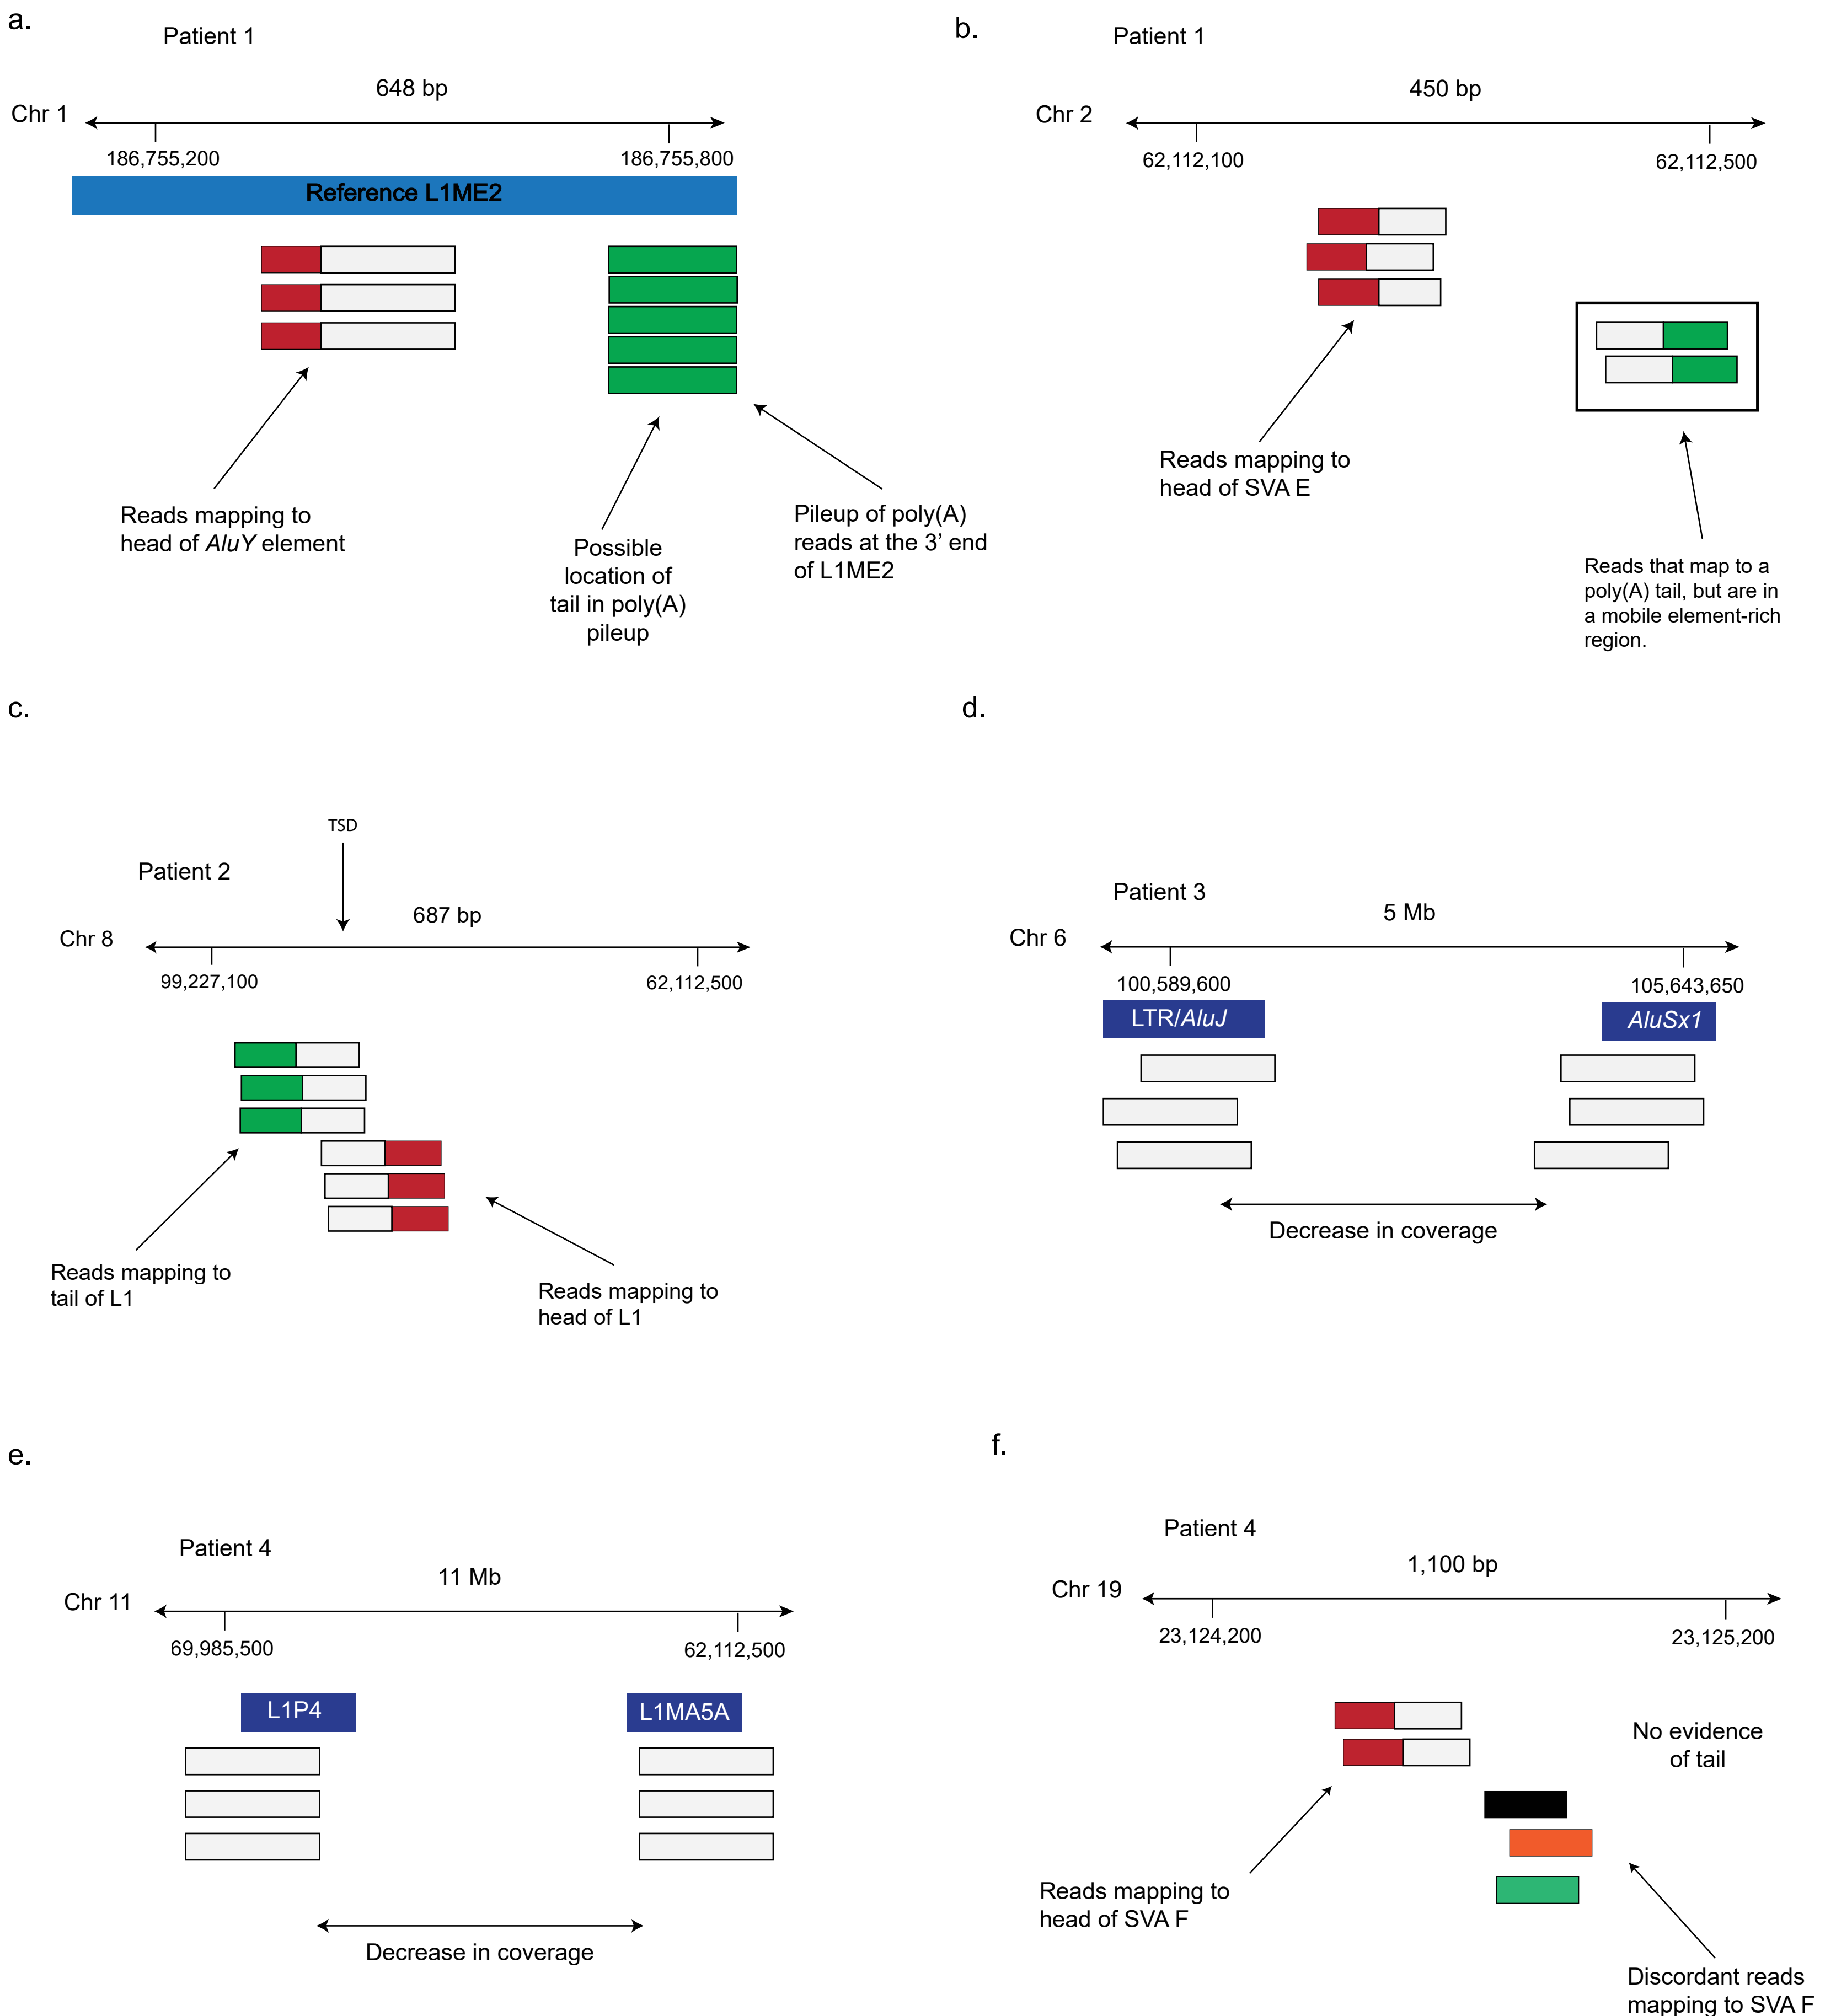

Supplemental Figure 2. Schematics of the remaining mobile element insertions and associated structural variants identified in this project. All mobile element subfamilies were determined using the UCSC genome browser for reference insertions and RepeatMasker for somatic insertions. A) Insertion of an *Alu* element inside an L1ME2. The insertion appears to be a non-classical insertion as there is no direct evidence of a poly(A) tail. It is possible that these reads have mapped to the poly(A) tail of the L1. B) Insertion of an SVA E in Patient 1. Example reads that map to the head and tail of the element are shown below the figure. Few reads line up to a potential tail of the insertion. C) L1 insertion in Patient 2. Example reads that map to the head and tail of the L1 insertions are shown below the figure. The location of the target site duplication (TSD) is shown above the reads. D) A mobile element mediated deletion in Patient 3. This appears to be a complex rearrangement between an *AluSx1* and a rearrangement that had previously occurred. E) A mobile element mediated deletion in Patient 4 between two reference L1 insertions. A decrease in coverage is visible between the two elements. F) An SVA F insertion in Patient 4. Reads mapping to the head of the SVA F were visible, but the reads mapping to the tail of the insertion were not found. There were multiple discordant reads just downstream of the insertion site that mapped to the SVA F. This may be a non-classical insertion or the insertion may be present at too low of a frequency to accurately identify the tail.



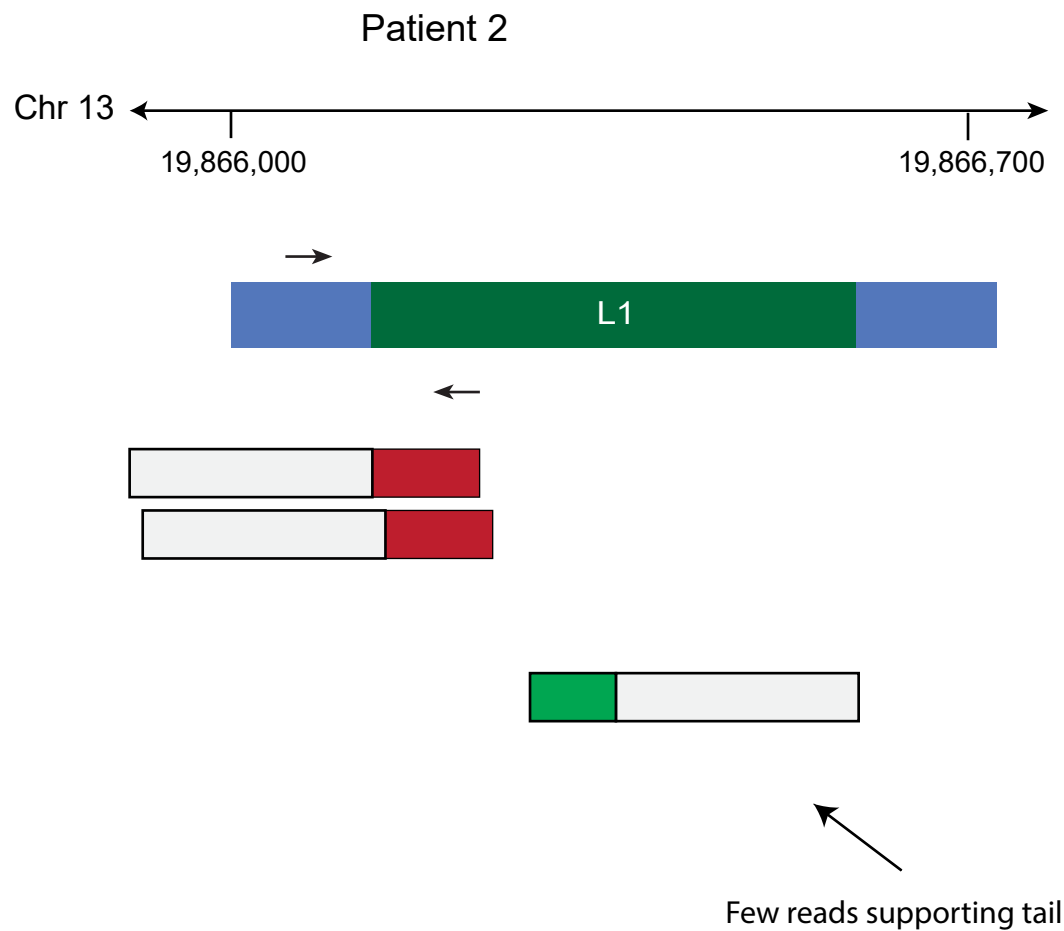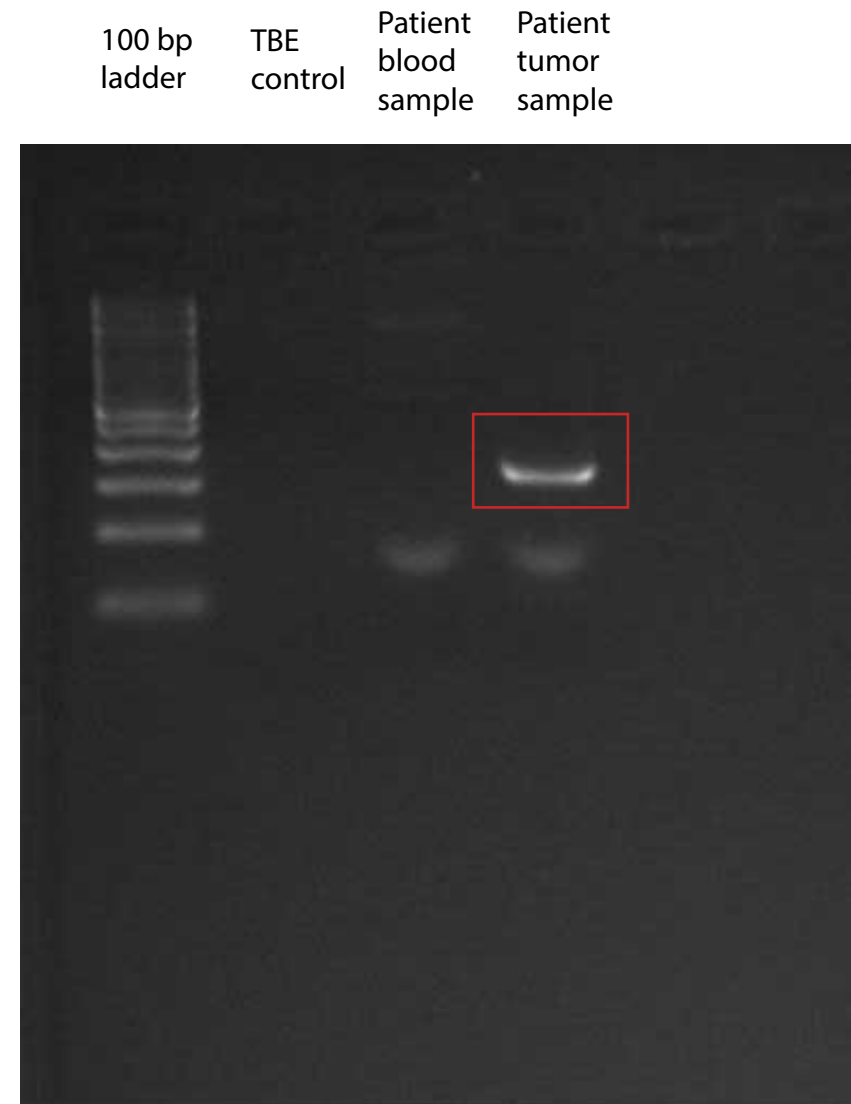

Supplemental Figure 4. PCR validation of a L1 from Patient 2. A schematic of primer design is shown on the left, with one external primer in unique genomic DNA, and one internal primer in the L1. An example of sequencing reads mapping to the head of the L1 insertion are shown as red and white boxes while the reads mapping to the tail of element are shown as green and white. A red box is surrounding the band of interest in the tumor DNA, which is not present in the matched germline DNA sample.

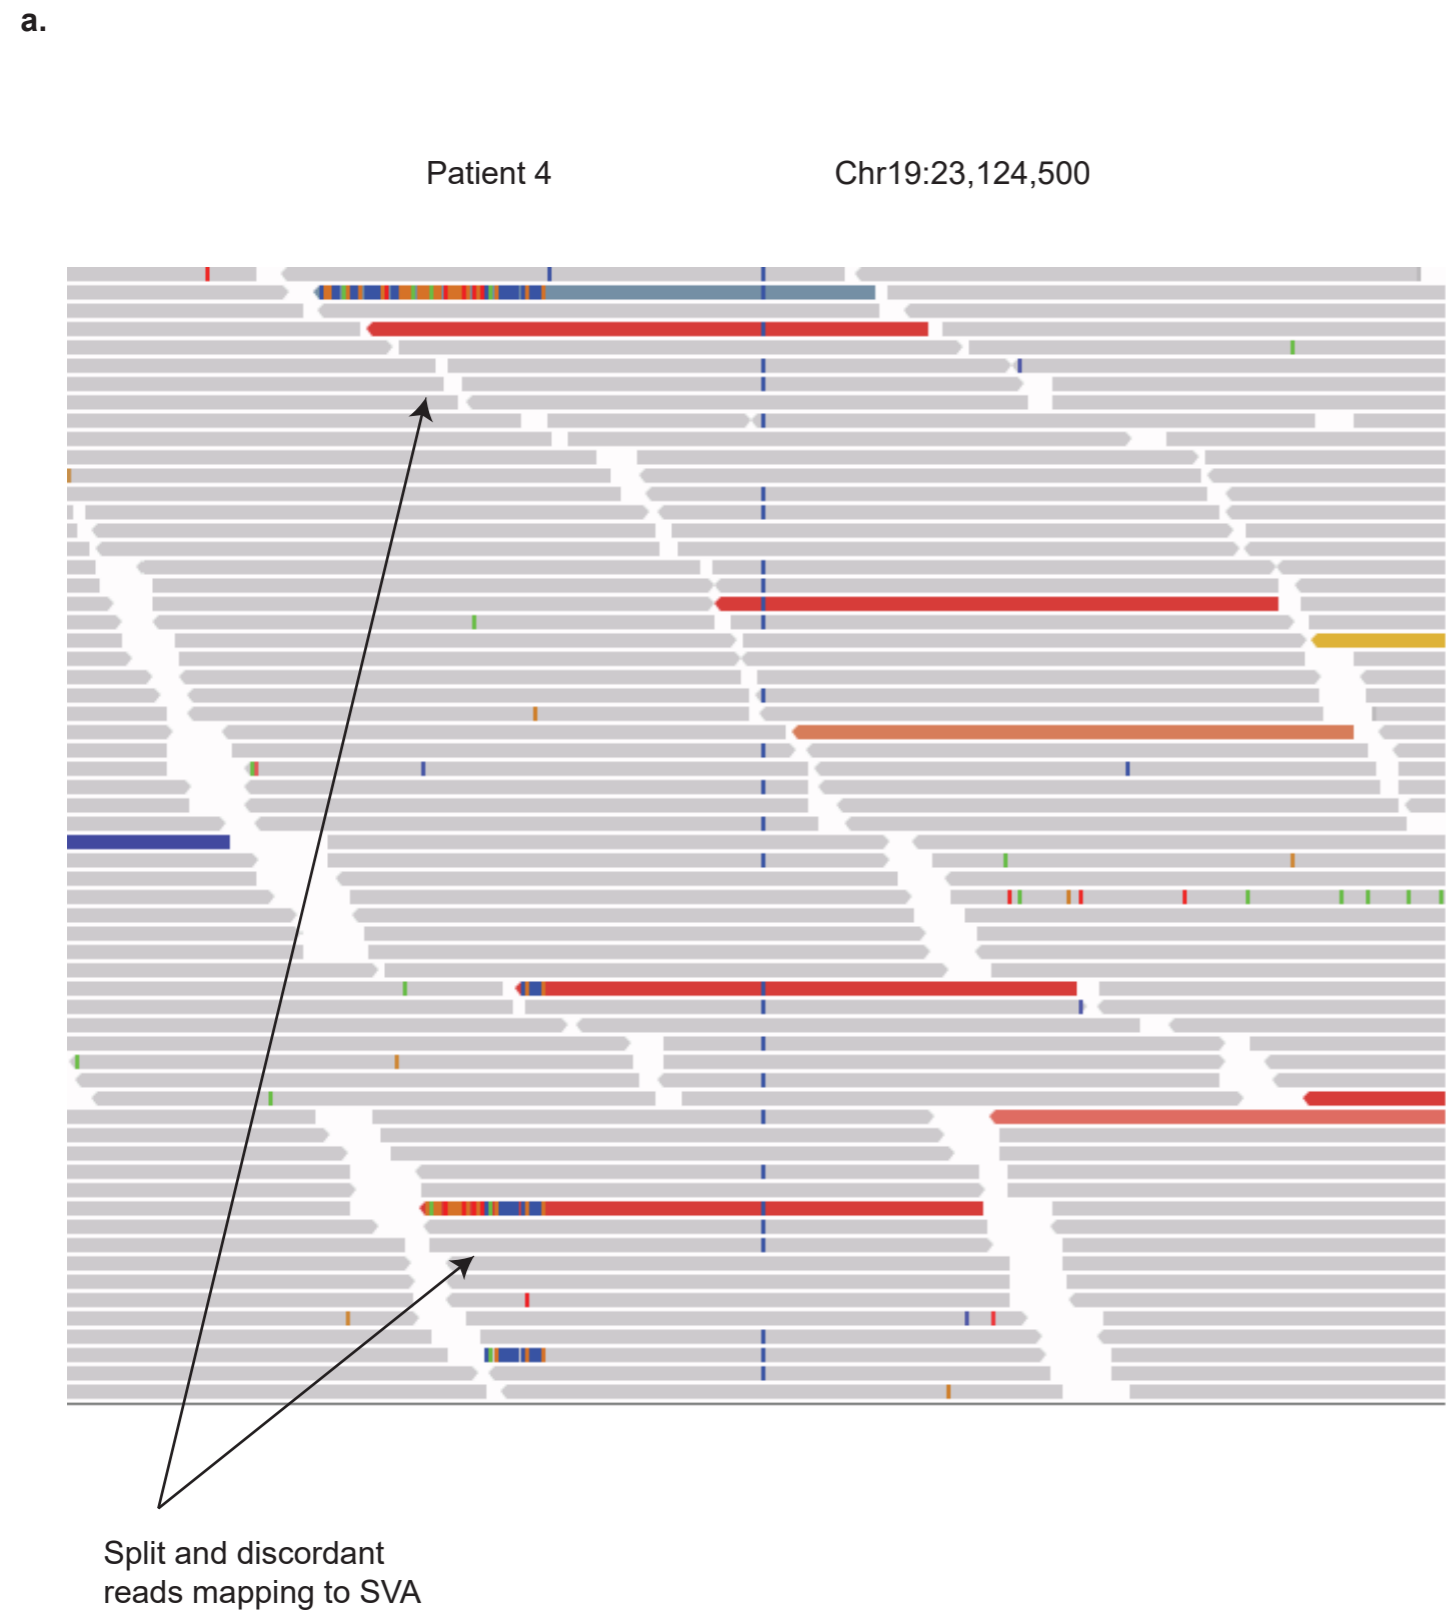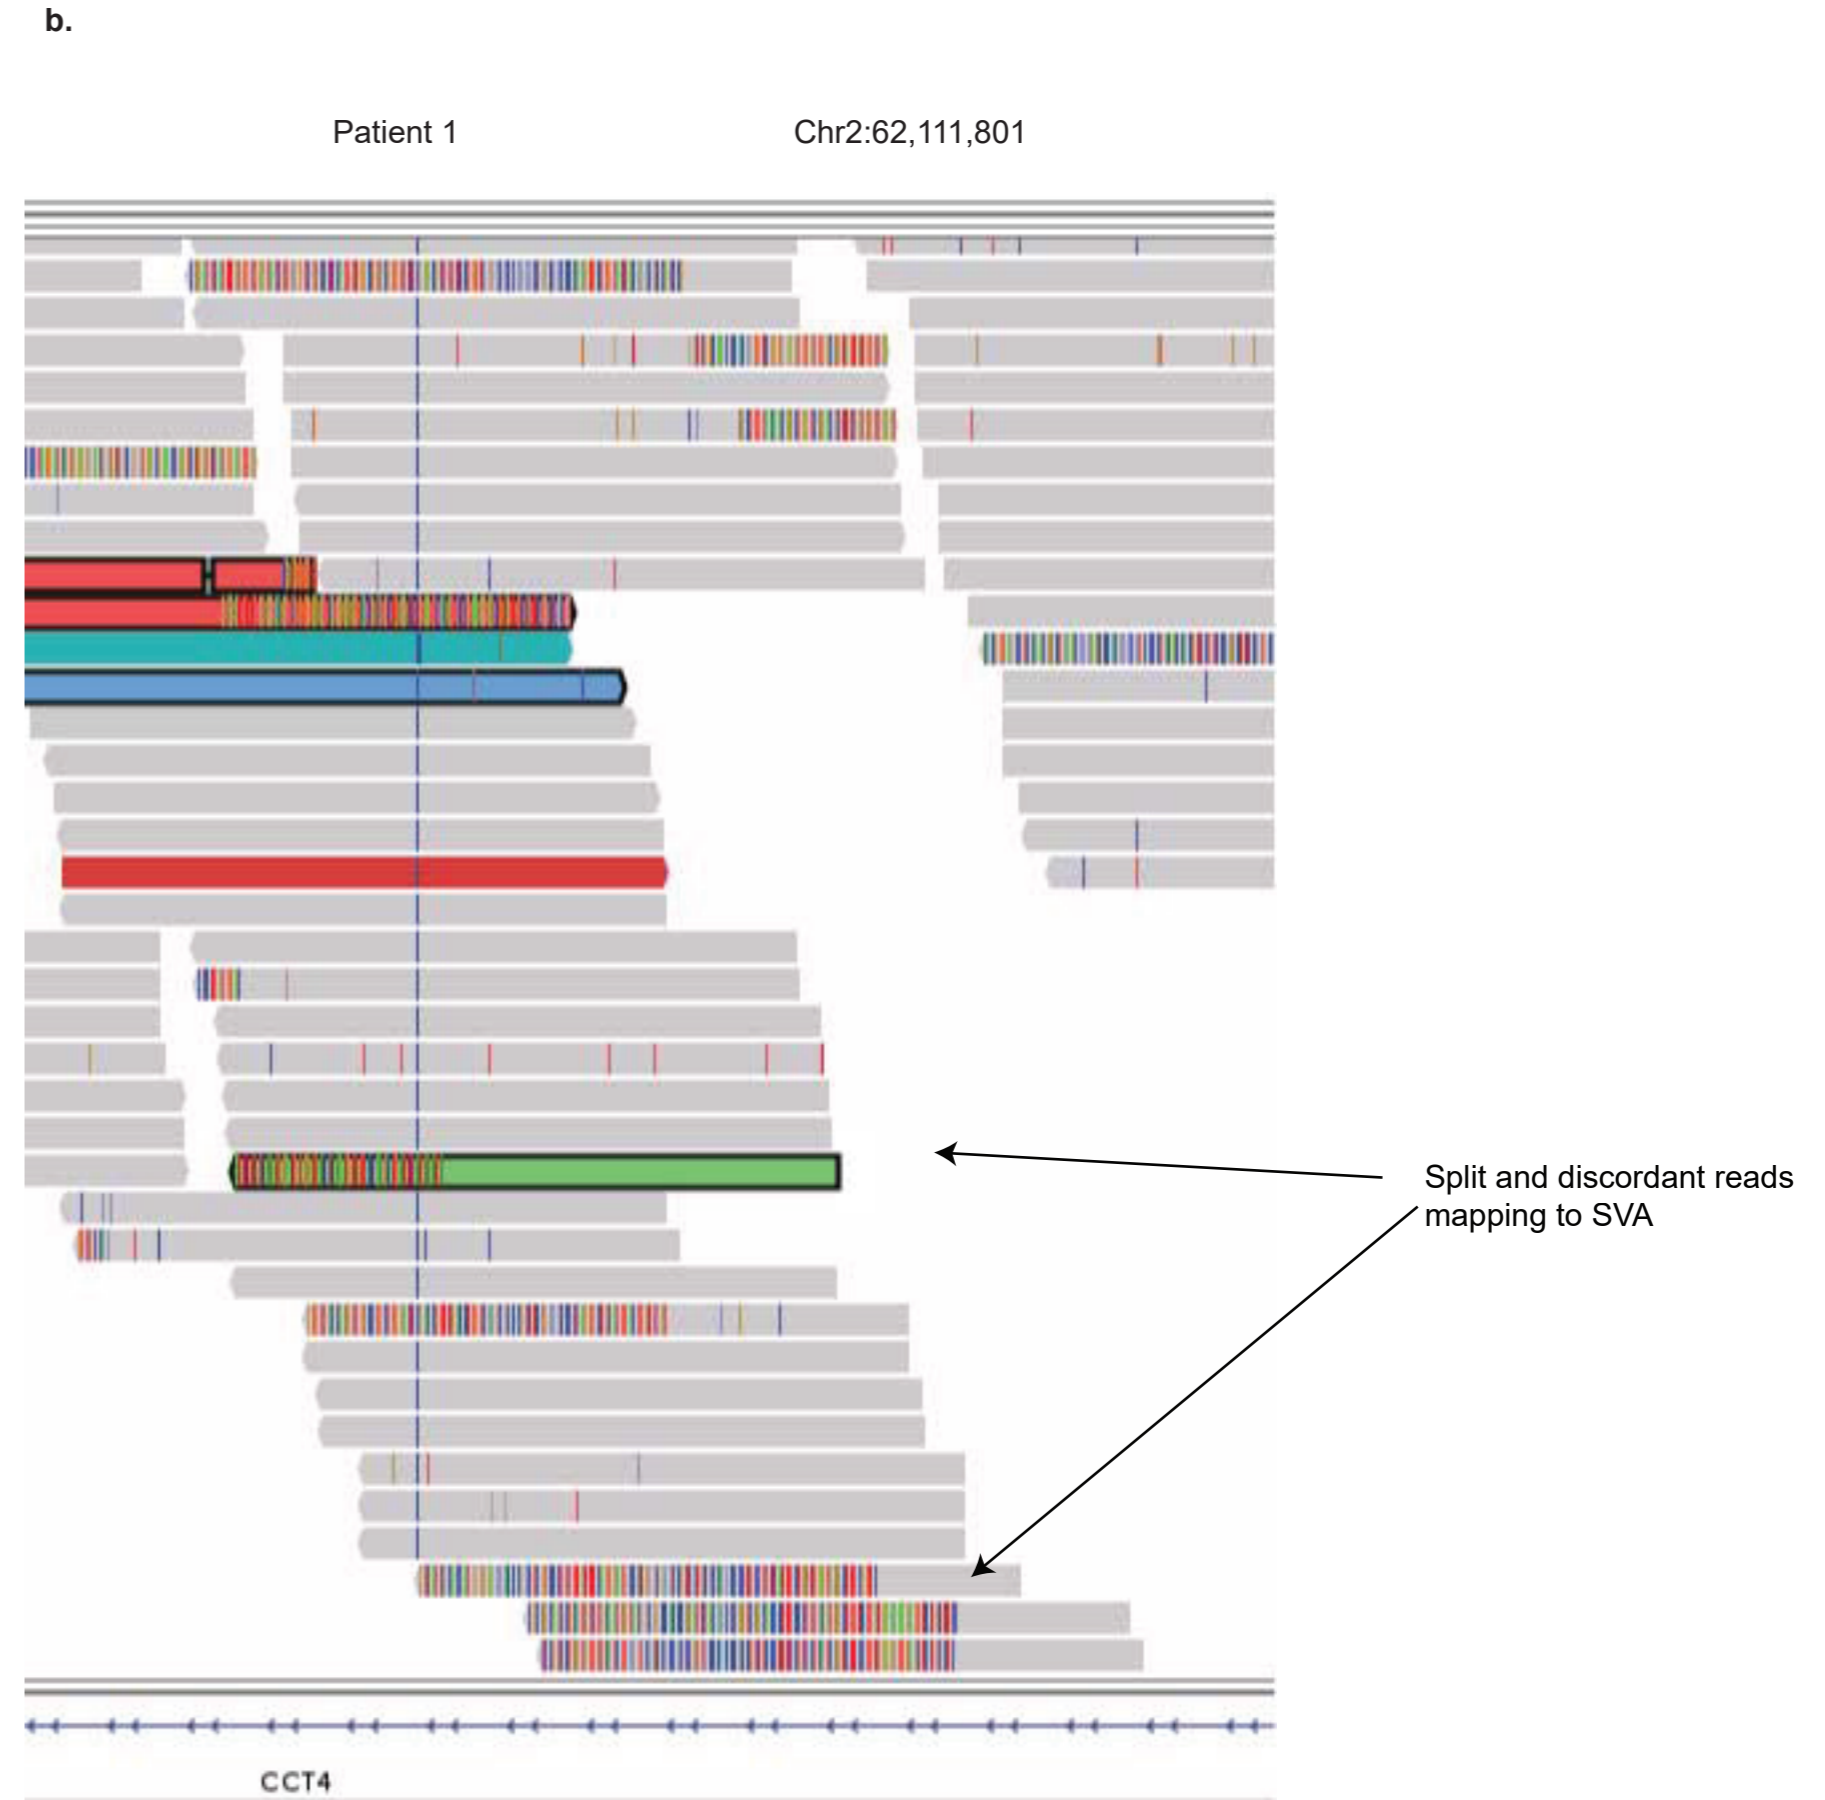

Supplemental Figure 5. IGV images showing the split and discordant reads that map to the two SVA insertions identified in this study. Part a) shows the insertion in Patient 4, while b) shows the insertion in a mobile element-rich region in Patient 1. Some of the discordant or split reads mapping to each insertion are denoted with arrows.

a.

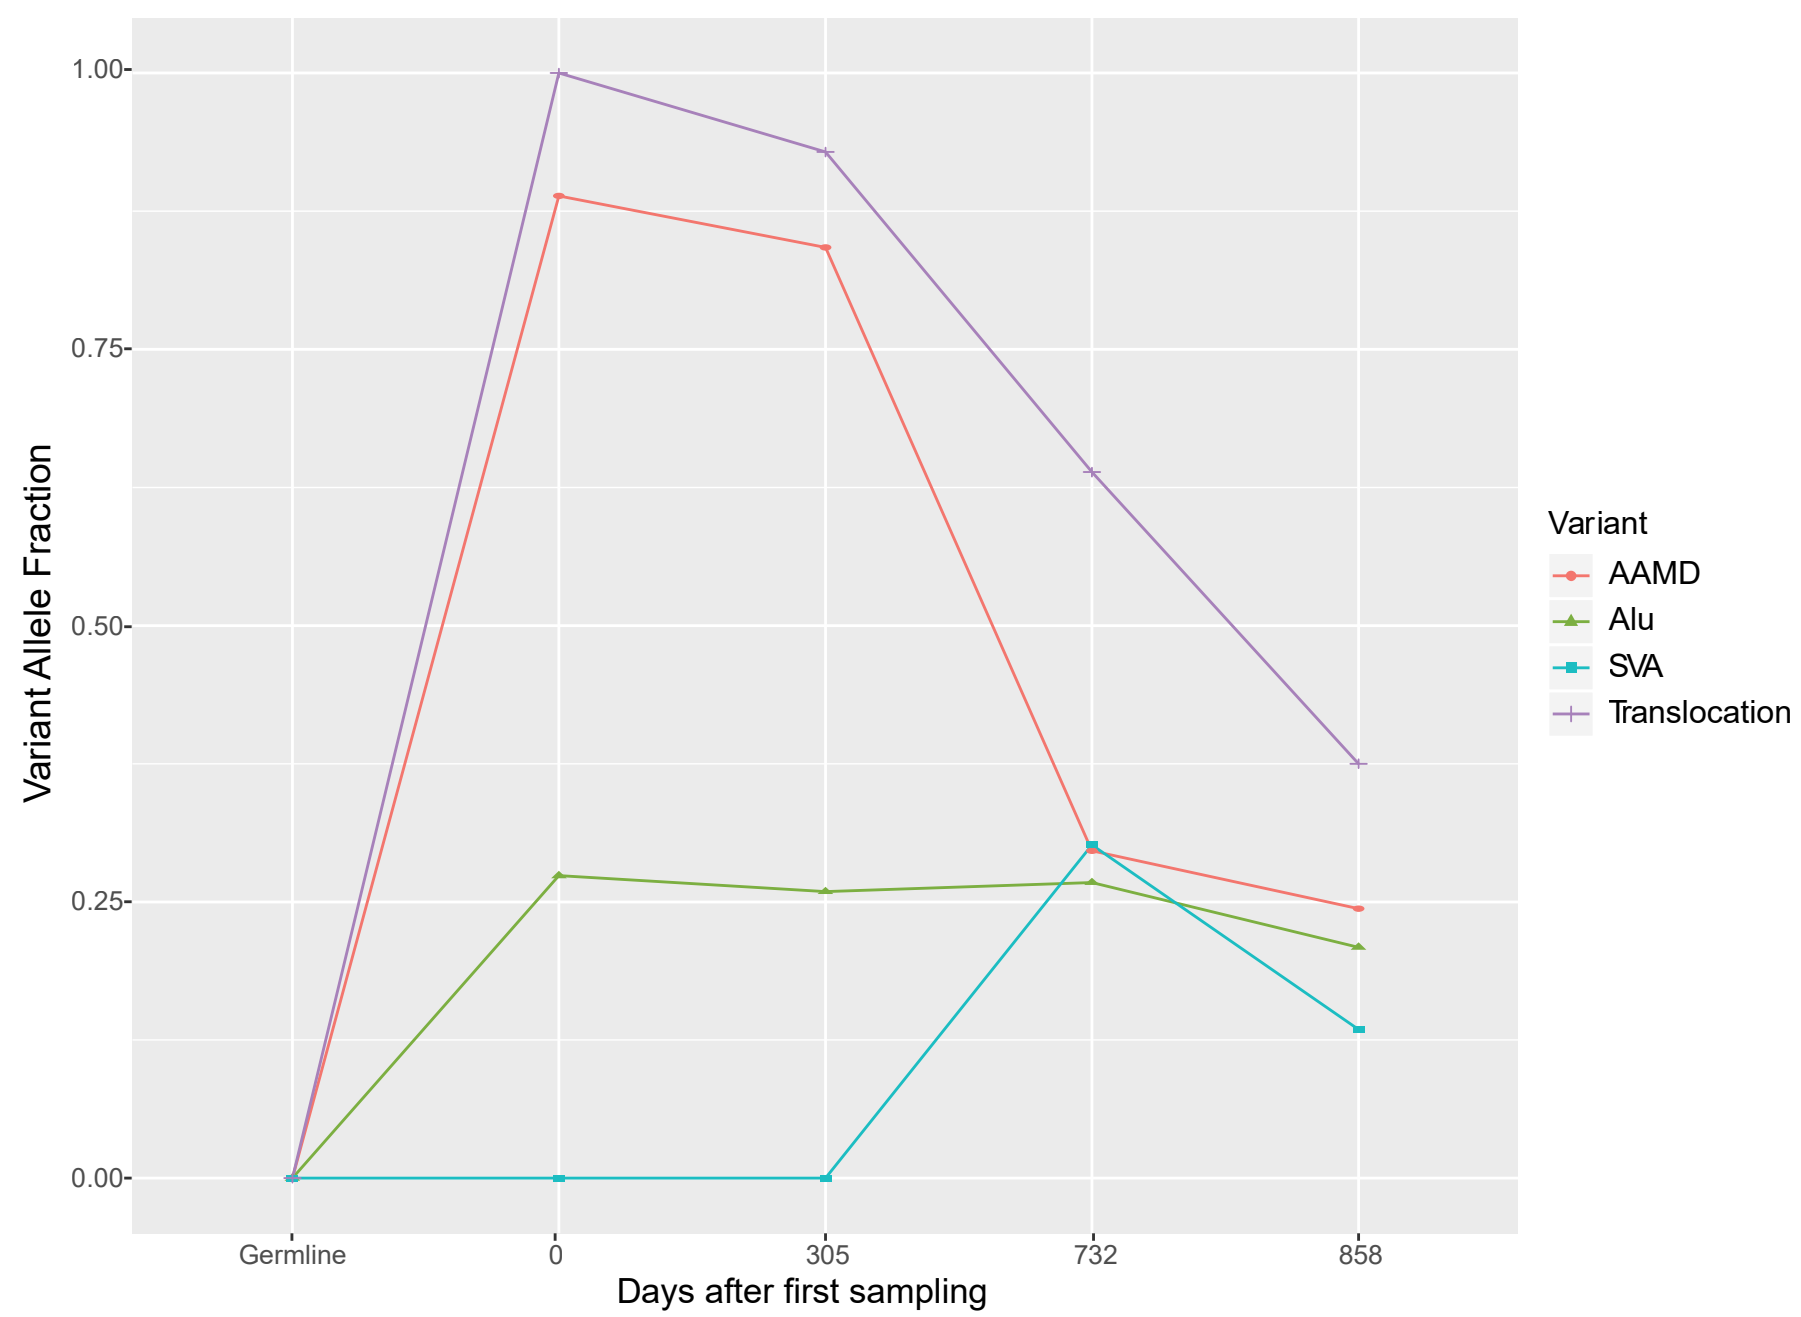

b.

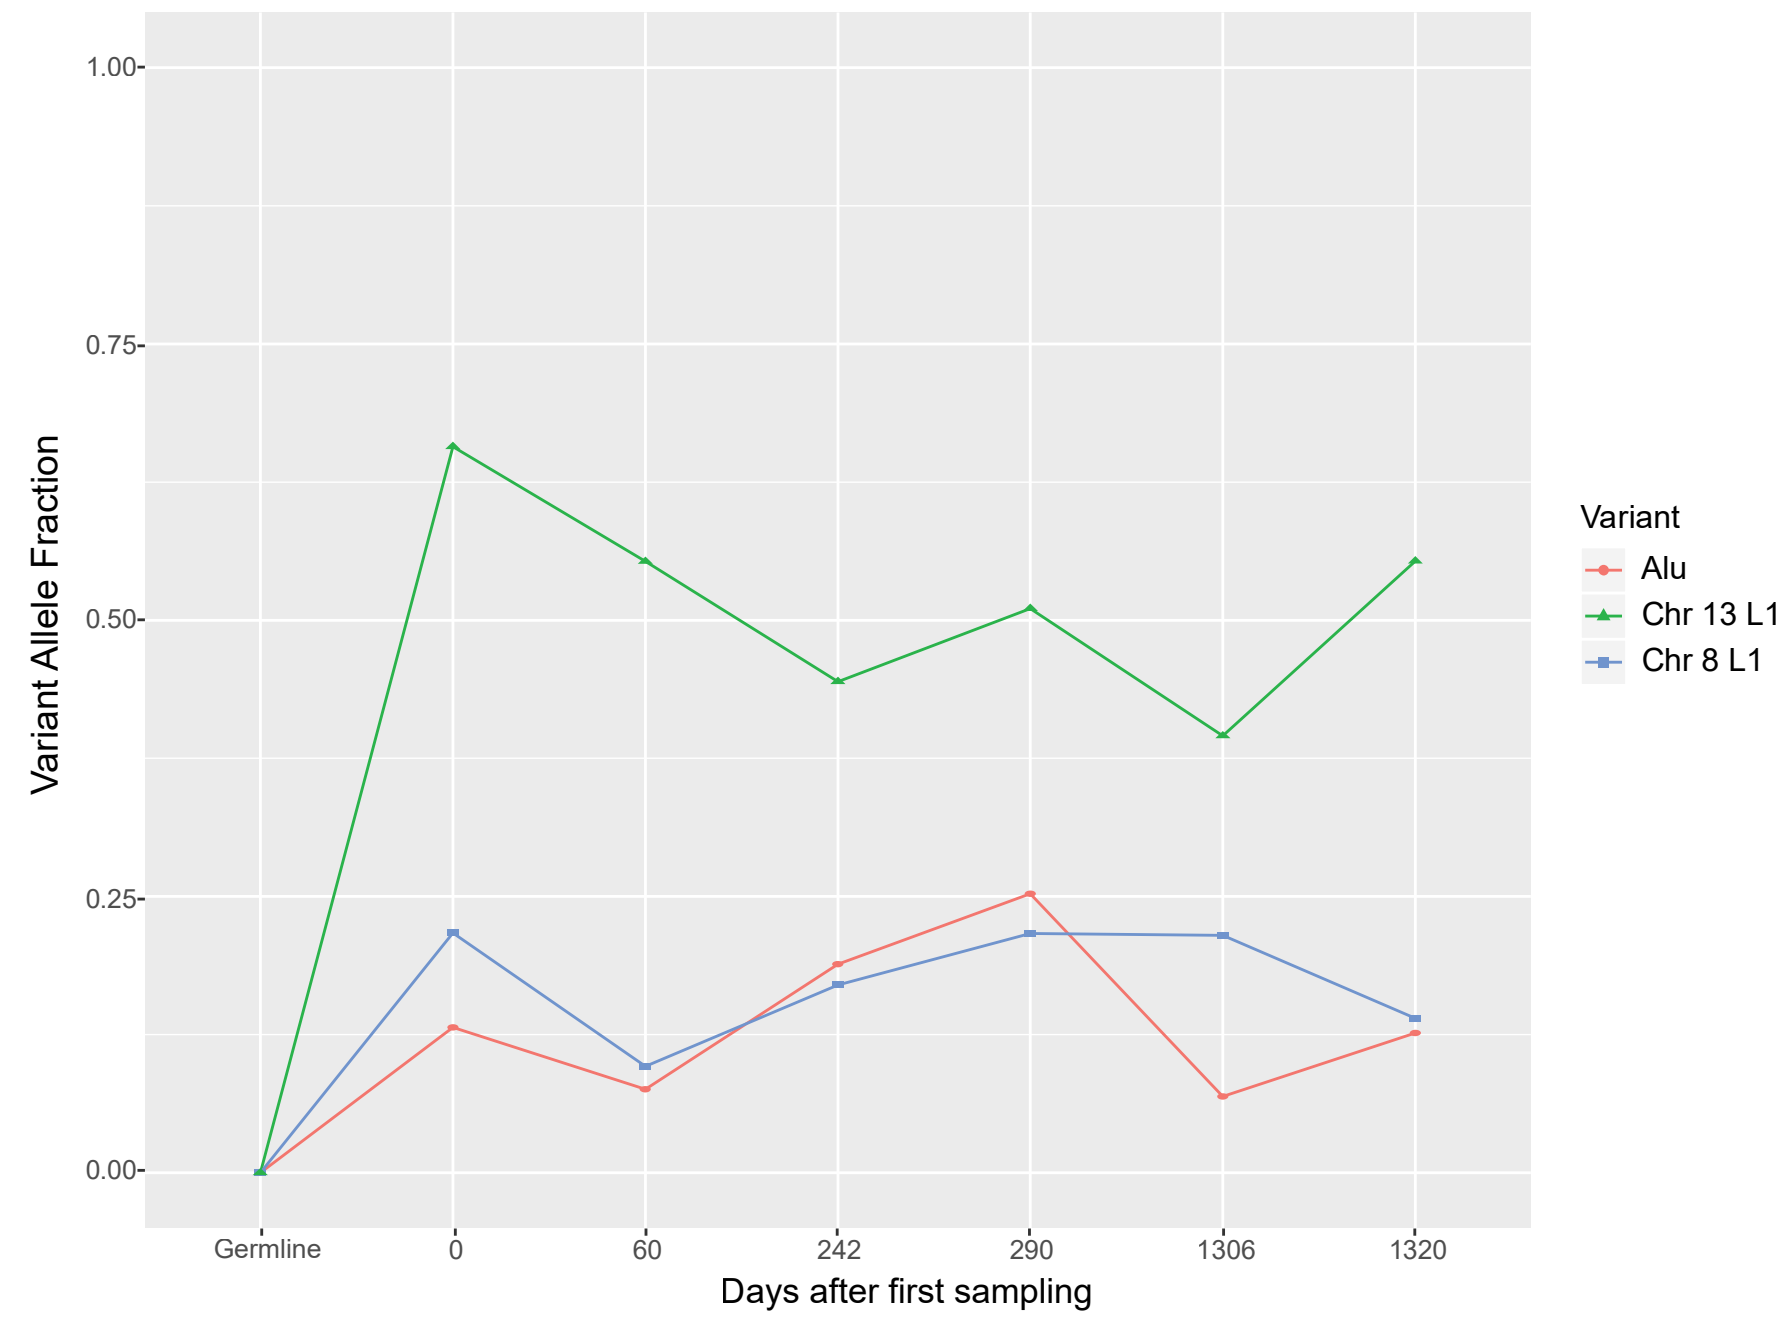

c.

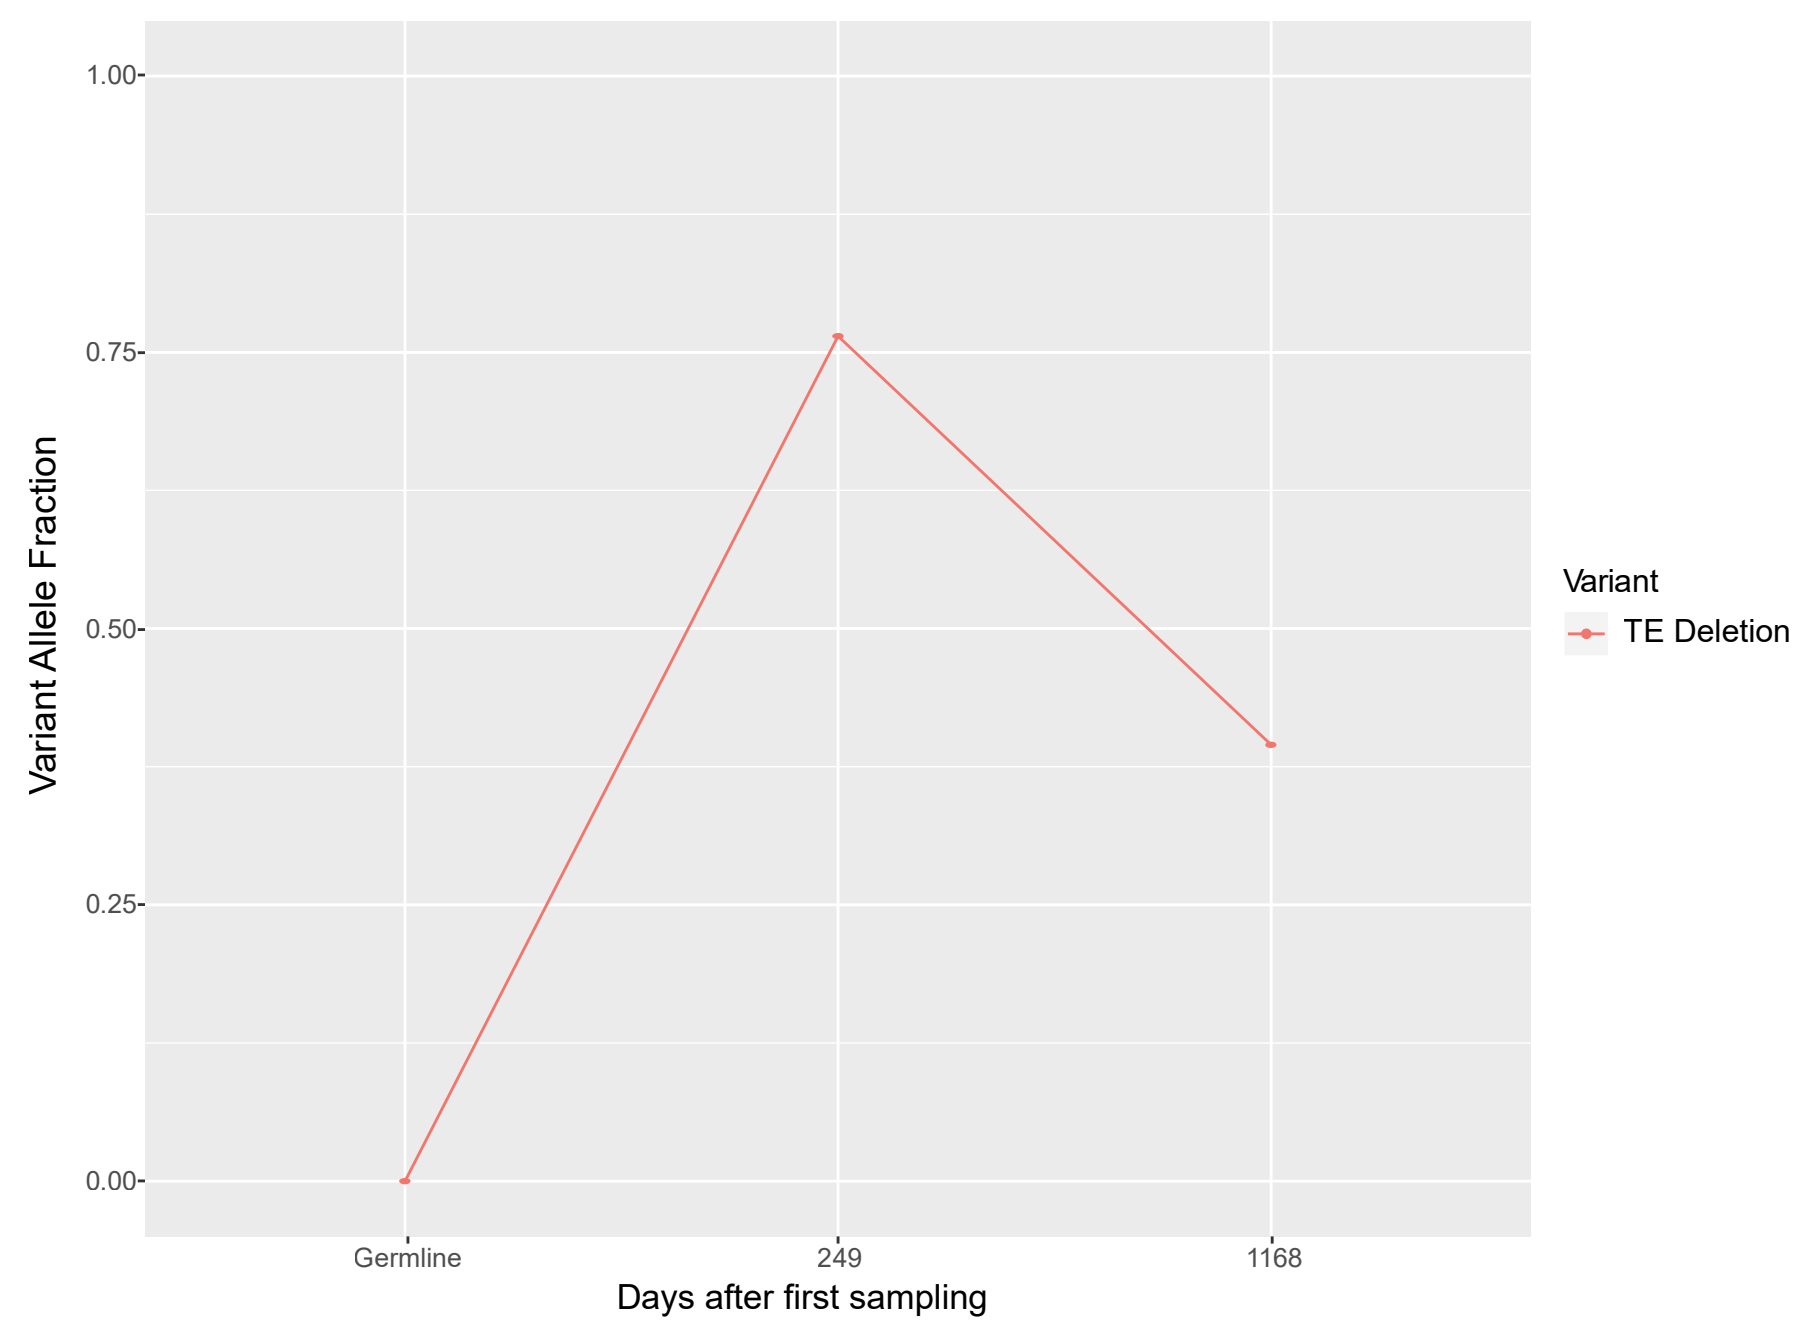

d.

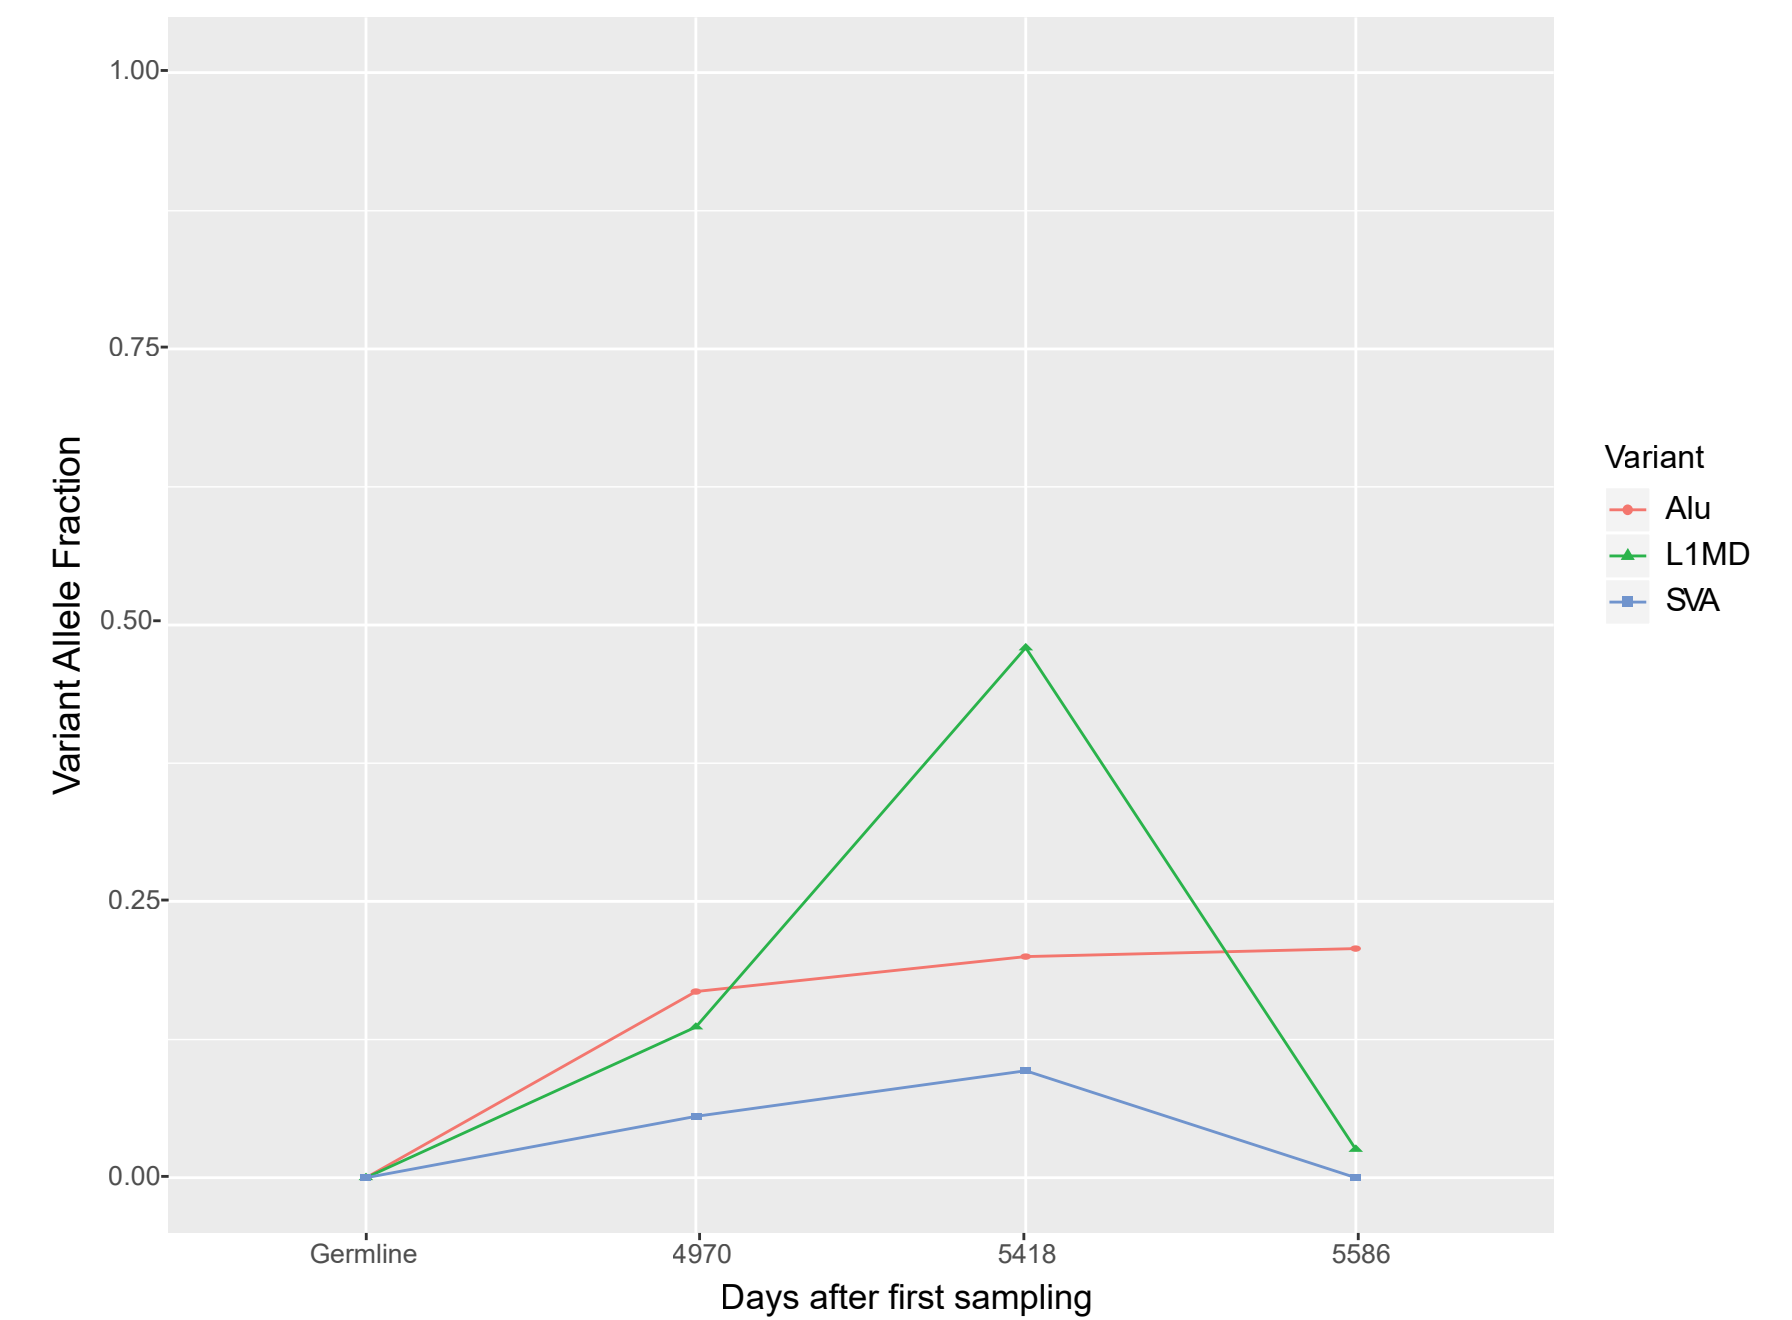

Supplemental Figure 6. Unadjusted variant allele fraction (VAF) for each of the four patients. Patients 1-4 are shown in parts A-D, respectively. VAF is shown on the Y axis, with the sampling timepoints for each patient shown on the X axis.

a)

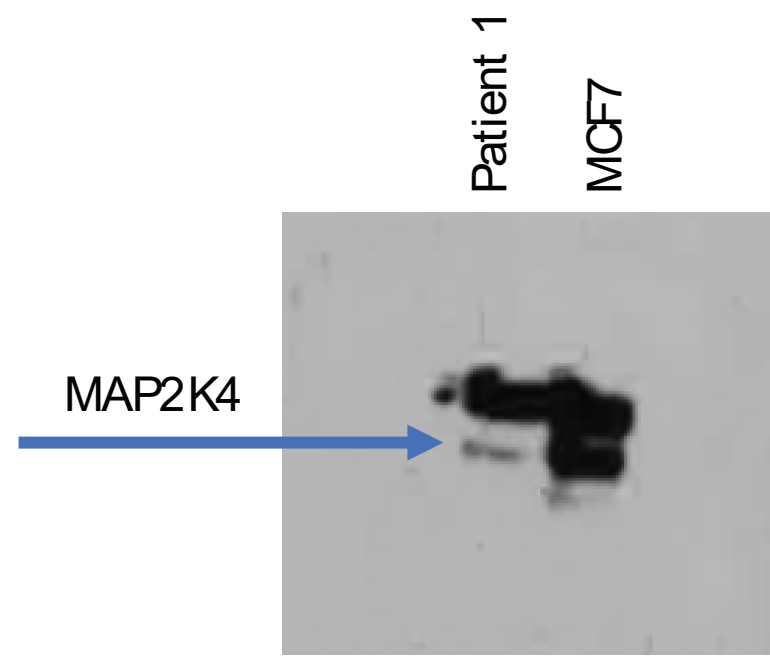

GAPDH  
Patient 1

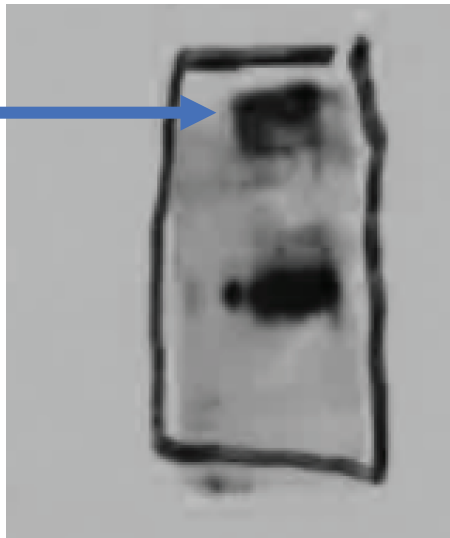

GAPDH  
MCF7

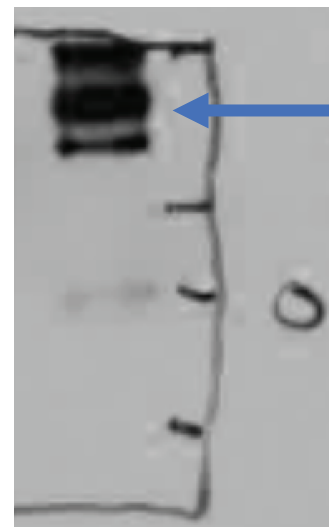

b)

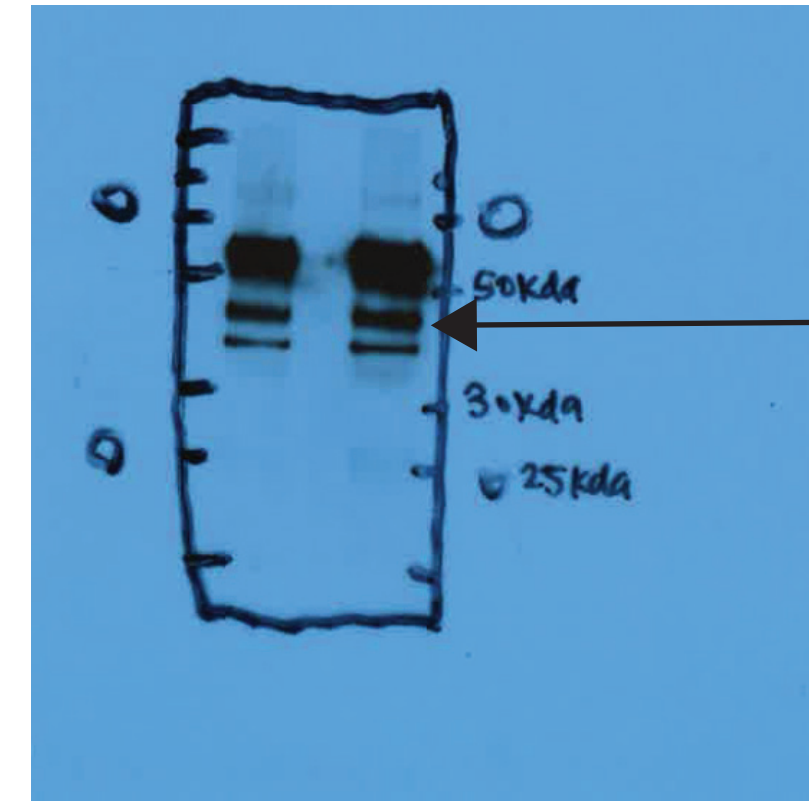

GAPDH in MCF7 cells (run in duplicate, uncut blot)

c)

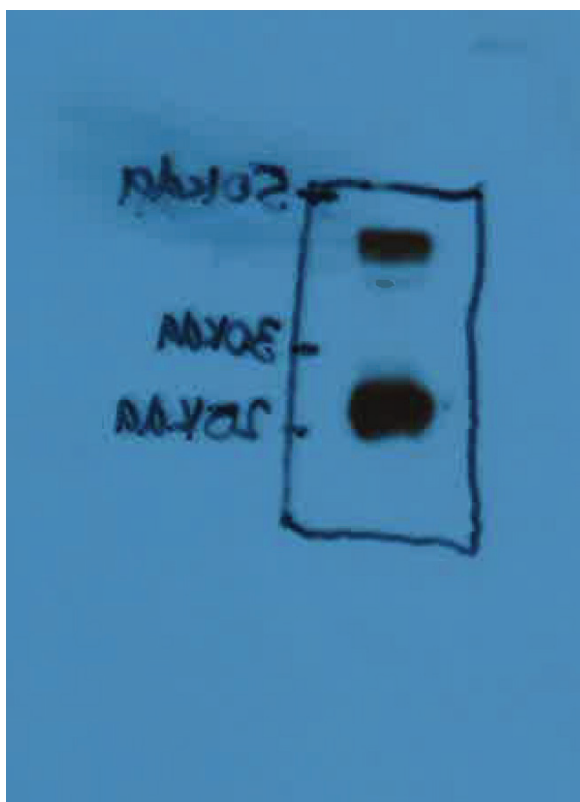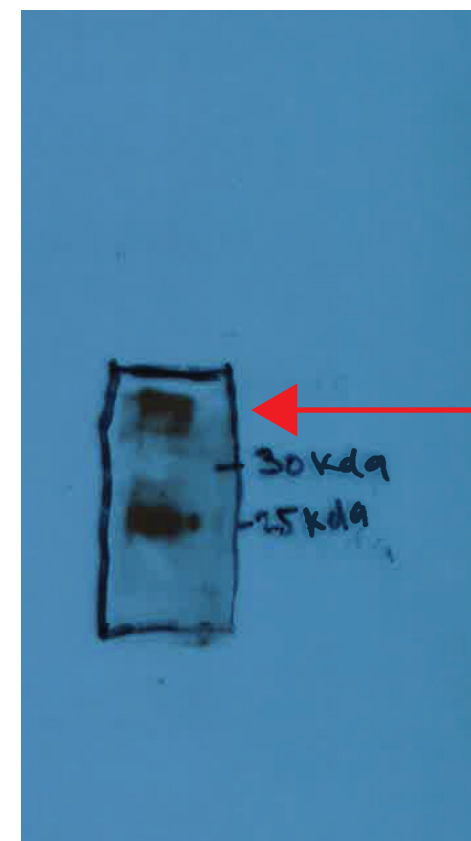

GAPDH in patient cells (same blot at different exposure times)

d)

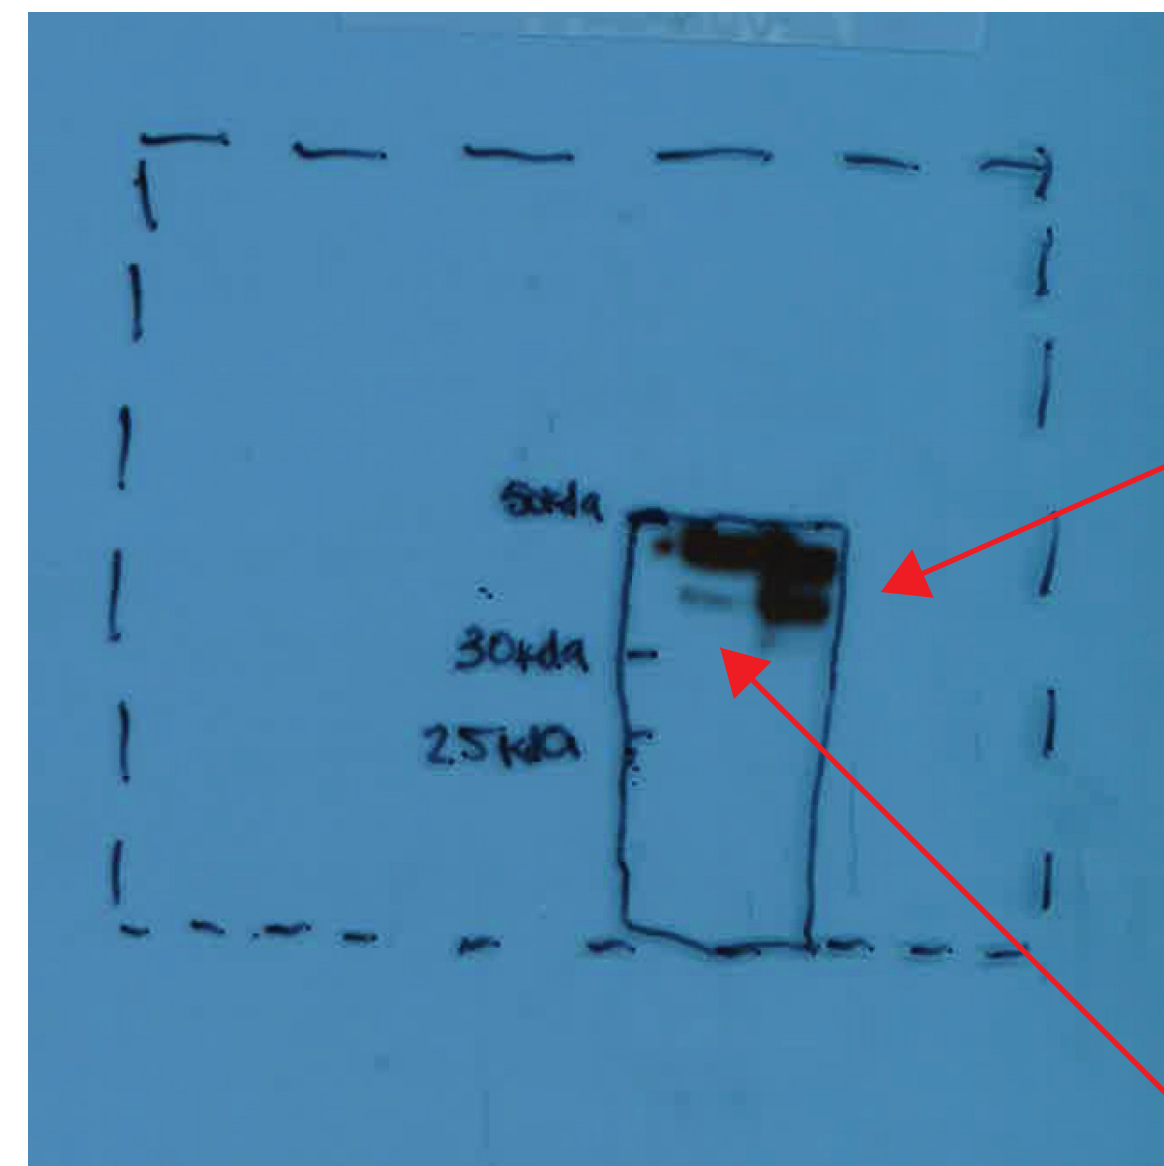

MAP2K4 in MCF7 cells

MAP2K4 in the patient sample

Supplemental Figure 7. Uncropped Western blot images for Patient 1 and MCF7 cells. Images were produced on X-ray film and do not show edges of an actual, full membrane. Blots were cut post-antibody incubation to ensure a clear image of the blots; molecular marker illustrated with sharpie. a) MAP2K4 is shown in the top portion of the figure, while the loading control GAPDH is shown in the bottom portion of the figure. b) Duplicate runs of GAPDH in MCF7 cells on membrane without top portion cut. c) Blot of GAPDH in the cells from Patient 1 at different exposure times. d) Western blot of MAP2K4 in the patient sample (left lane) and MCF7 cells (right lane) with size of full membrane outlined with a dashed line.

Supplemental Table S1. Tools that identified each insertion or structural variant. An "X" denotes that the tool identified the variant. RUFUS was unable to run on Patient 4. This has been denoted with "N/A".

| Patient   | Locus                           | Variant                                   | MELT | TranSurVeyor | RUFUS |
|-----------|---------------------------------|-------------------------------------------|------|--------------|-------|
| Patient 1 | 1:186,755,400                   | <i>Alu</i> (non-classical insertion)      | X    |              | X     |
|           | 1:29,089,030                    | <i>Alu-Alu</i> associated deletion (23kb) | X    | X            | X     |
|           | 2:62,111,770                    | SVA insertion                             | X    |              | X     |
|           | 17:11,974,341/<br>22:48,343,831 | <i>Alu</i> -associated translocation      | X    | X            | X     |
| Patient 2 | 2:15,168,000                    | <i>Alu</i> (non-classical insertion)      | X    | X            | X     |
|           | 8:99,227,400                    | L1 insertion                              | X    | X            | X     |
|           | 13:19,866,150                   | L1 insertion                              |      | X            |       |
| Patient 3 | 6:105,643,750                   | <i>Alu-Alu</i> associated deletion        | X    | X            | X     |
| Patient 4 | 10:67,431,020                   | <i>Alu</i> insertion                      | X    | X            | N/A   |
|           | 11:81,149,160                   | L1-associated deletion                    | X    | X            | N/A   |
|           | 19:23,124,500                   | SVA insertion                             | X    |              | N/A   |



Supplemental Table S2. Estimates of tumor purity, average genome-wide copy number, and genome-wide coverage (sequencing depth) for each of the samples at each timepoint.

| <b>Patient</b> | <b>Sampling timepoint</b> | <b>Estimated Tumor Purity (%)</b> | <b>Genomic Copy Number</b> | <b>Genome-wide Coverage</b> |
|----------------|---------------------------|-----------------------------------|----------------------------|-----------------------------|
| Patient 1      | Germline                  | -                                 | -                          | 74.63                       |
|                | Day 0                     | 94.5                              | 1.88                       | 81.87                       |
|                | Day 305                   | 90.75                             | 1.87                       | 74.2                        |
|                | Day 732                   | 79.21                             | 1.86                       | 73.04                       |
|                | Day 858                   | 60.76                             | 1.86                       | 74.23                       |
| Patient 2      | Germline                  | -                                 | -                          | 32                          |
|                | Day 0                     | 89.62                             | 3.9                        | 70.51                       |
|                | Day 60                    | 88.51                             | 3.98                       | 73.03                       |
|                | Day 242                   | 79.75                             | 3.86                       | 72.14                       |
|                | Day 290                   | 87.32                             | 3.96                       | 69.27                       |
|                | Day 1305                  | 78.97                             | 3.73                       | 67.2                        |
|                | Day 1320                  | 72.15                             | 3.73                       | 73.74                       |
| Patient 3      | Germline                  | -                                 | -                          | 72.42                       |
|                | Day 249                   | 85.51                             | 2.09                       | 70.88                       |
|                | Day 1168                  | 81.82                             | 1.95                       | 62.24                       |
| Patient 4      | Germline                  | -                                 | -                          | 29.7                        |
|                | Day 0                     | 30.91                             | 4.12                       | 54.78                       |
|                | Day 2970                  | 85.91                             | 1.98                       | 60.81                       |
|                | Day 5418                  | 74.78                             | 2.01                       | 58.49                       |
|                | Day 5586                  | 39.58                             | 2.03                       | 58.72                       |

Supplemental Table S3. MAP2K4 transcripts produced by Trinity.

>TRINITY\_DN93516\_c0\_g2\_i1 len=235 path=[0:0-234]  
CGGACGTCATCAAAGATCCCTGGGAGTCGGTTGGCCTGCGGCAGCTCGTT  
GCTTTTCTTCGGCTGCCTCCTCCTCAGTGGCCTCACTGCCCCGAGGGGTGC  
GGATGGGACTCGGACTGGCCCTGAAGAAAGTGACCACGAAAGGCTGTTGG  
GAGCGTGGGGCCCGTTGACCCAGCAGGCCGGCCAGGCCAGGATCCACGCT  
GTGCCATGTGTGGGTTTTGAACTCCTGTAGGATTG

>TRINITY\_DN10603\_c0\_g2\_i1 len=247 path=[0:0-246]  
GAGCCCTTTTTTCTAGAGTCTGATGTAGCAGCGATATCAATCGACATAC  
ATGGGAGAGCTGGGAGTAGCTGGCATTGATCCAGGATTTTACAAACATA  
GCATGCGACCTCAACGGCACGTTCTTCATACATCAAATAAAGGGATGTT  
TCAGAAGCTCTTTATACTTTGGCCTTTTGGATTCATCCTTCGTAAGGCAC  
AAGTTGACAAAGTTGATGAACTCGGGGAGAATTCCTTTCTCAGA

>TRINITY\_DN102065\_c0\_g1\_i1 len=1612 path=[0:0-:2:1369-1611]  
CGGCCTTTGGCTGGCTCAGAACAAAGGACCCACCTGTACCACAGCTGAGC  
TGAGAGAATGGAGGCATTTGTCCTTAACTCAGAACAGTCCCCAGACTTAT  
TGATCTCAGAACCAAATGTCAAATACCCCACTTTCCGAAATAATTGTCTC  
TCTTAAAAGTTCTGTGCAAATTGAATTTTTATAAATCAAATTGTATTGTA  
AAGCCAGTAAAGAGAAGTGCTGCTTATGGGAAGCTTGTTCCTTACTTT  
ATAAATGGAAGCAAACCGTGCTATGAATAAGAGCTGTTAGTTAACTTTGC  
TTATAAAGCCTTTTAAAATGTTCACTTTTTTTTTTATAATATTTGTTT  
TTTTGAAAGGGGGTGGCAGTTCTGCGACTGTATGTTTGGAACATCAAT  
GAAGCGGGGGCCTTGAGAGTATCCGGAGTCGAAAAGGATTTCCATTCCA  
GGGAAGGGTCTGGAATAGTAAAGAAGGCATGGCTTCTAGAGTCCTCTGCT  
ATCCCCTCATGACACATTGATTGAGCACAGTCGGTGCCAGCCACCTTCC  
AGTCTTGGGTCACTCCTGAGTCCAGTGGGTCTCCAGTGTGAGTGTGCACC  
ACAGTCACCCGGGGTCTATCAAACACAGGCCTTGGTGTCCCACCCCC  
AGAGTTTCTGACTCGGTAGGTCAGGATATAGCTTGAGAATGTGCATTTCT  
AGTGAGTCCTCAGGTGGTGCTGAGGCTGCTGGTTCTGACGCACTTTGAGA  
ATCACTGATCGGTGAATACACGAAAGTCCTTCCCGTTCTGGGAGTTGATA  
GTCTCTACAGAACCGTGCTTCTTTTCTGGCCCTGTGAGTCTTAGCTGG  
CAATGAACACGGAAGCTGGCTTGTCTATGACGTCCCTTCGCGGTGCTGTA  
GGGATTTAGTATTCAGCATGTGGAAGGTTCTCAGTAAGACTTCTTCTAT  
CTTTGAGTTTGGAAACATGATTGACAGAAATTCAGTTTGACTTGTGGGG  
TATGAATCTGTAGATGTGGGTCTGAGTTCTGATTCCGGTGAGATCCGTCTG  
TATAACTCAGTCATCCTTCACTGCTTGGACATTTATTTCTTTTCTATG  
GAATGCATTCACTTCTTCACTTCAACAGATAATCATAGAGCACCAA  
CTCTATCTGCACCATGGATTTTGCAAGCTCCCTGCACATCACTGCAACTG  
TTCTTCTGTGTCGGTACTGTTACGATCTCTAGATGAATACTGCTTTATGC  
ATCCTTCTGCAATGCAGCTCTGTTAATTCGGAAATTTCCACAGTAAACT  
CGGTCTGTCAGTTACCATGGAAACTGCCTGCTTCTGGCACTACCAACAA  
ATGAGTATCTTTGCTGTGATATGTGTGGGTTTTGAACTCCTGTAGGATTG  
GGATTCAGAGTAAACCTTGCTGTAGATTTGAAAGGTGGATTTGCAAAT

CAACTTCAGTGCTTTGCGTTTACCCTGCATGCTGCTGACGGCCGGGTGGC  
CTGGCGCCGGGACCCTACGGGGCCGGGGGTGCCGCTGCCGCTGCCGCC  
CCGGAGCCGCCGCCGCTCGGGCTCGGAGCCGCCATTGTTGGGAGTGA  
AGAGCCGAGCGG

>TRINITY\_DN102065\_c0\_g1\_i2 len=369 path=[1:0-:2:126-368]

AGAACCATAAGCTCCTCGTCCAATTTCTCCAAGGTCTTTCAAGTCCTCTG  
CAGTGAAATCCCAGTGTTGTTACAGGGGAGATCTTCAGTTTTCTGATGAC  
TCAATGCTGTGTGTTCTCAGTCTCTATGTGTGGGTTTTGAACTCCTGT  
AGGATTGGGATTACAGAGTAAACCTTGCTGTAGATTTGAAAGGTGGATTG  
CAAATTCAACTTCAGTGCTTTGCGTTTACCCTGCATGCTGCTGACGGCC  
GGGTGGCCTGGCGCCGGGACCCTACGGGGCCGGGGGTGCCGCTGCCGCT  
GCCGCCCGGAGCCGCCGCCGCTCGGGCTCGGAGCCGCCATTGTTG  
GGAGTGAAGAGCCGAGCGG

>TRINITY\_DN97116\_c0\_g1\_i1 len=604 path=[0:0-603]

AGATGAGGATCCGAAACGGCAGCCTTTACGTTTACACCTGCTAGAACCT  
CTCGTAGTCCATCACCATTTCTTGGCATTGGAATTCTACTGGAAAAAAT  
ACAAAAAGCAAAACAAAACCCTCAGCACTGTTACAAGAGGCCATTTAAGT  
ATCTTGTGCTTCTCACTTACCCATTAGCCAGGTTCTCATTAGGTTTTGC  
TTGGGCCTCCCTGGCACTGAACCTTAGGCTTTGTATGACAGTGAAGCAGC  
ACTGTGAGTGGTTCAAGCACACTGGAATATAAACAGTCATGGCCTGAGA  
TGCAGGTGATGCCATTACAGAACCAAATCGTGGCACGTATTGCTGTGTCT  
CCTCTCAGAGTGACAGTCATAAATACTGTCAAACAATAAAGGGAGAATGG  
TGCTGTTTAAAGTCACATCCCTGTAAATTGCAGAATTCAAAAGTGATTAT  
CTCTTTGATCTACTTGCCCTATTTCCCTATCTTCTCCCCACGGTATCCT  
AAACTTTAGACTTCCCACTGTTCTGAAAGGAGACATTGCTCTATGTCTGC  
CTTCGACCACAGCAAGCCATCATCTCCATTGCTCCCGGGGACTCAAGAG  
GAAT

Supplemental Table S4. Alu, L1, and SVA loci that showed significant changes in expression from early to late timepoints in Patient 2.

| chr | start     | end       | Mobile Element   | baseMean    | log2FoldChange | lfcSE       | stat         | pvalue      | padj        |
|-----|-----------|-----------|------------------|-------------|----------------|-------------|--------------|-------------|-------------|
| 1   | 109203930 | 109204222 | AluJb:Alu:SINE   | 23.46182463 | -2.109950161   | 0.58007411  | -3.637380338 | 0.000275425 | 0.01506445  |
| 1   | 109206011 | 109206314 | AluSz:Alu:SINE   | 45.25034576 | -1.830683668   | 0.456046741 | -4.014245699 | 5.96E-05    | 0.005047421 |
| 1   | 109203594 | 109203905 | AluY:Alu:SINE    | 43.15747907 | -1.79251291    | 0.491600898 | -3.646276717 | 0.000266067 | 0.014681215 |
| 1   | 108578637 | 108579660 | L1HS:L1:LINE     | 81.47747476 | -2.027317557   | 0.583551341 | -3.474103157 | 0.000512564 | 0.024072006 |
| 1   | 197508889 | 197509568 | L1MC3:L1:LINE    | 66.87760841 | 1.985711868    | 0.45036542  | 4.409112643  | 1.04E-05    | 0.001345511 |
| 1   | 108576306 | 108578640 | L1PA2:L1:LINE    | 90.46863613 | -1.912077293   | 0.545291352 | -3.506524145 | 0.000454    | 0.022293839 |
| 1   | 108542343 | 108548024 | L1PA6:L1:LINE    | 109.2501839 | -2.685625968   | 0.58408623  | -4.597995692 | 4.27E-06    | 0.000645942 |
| 1   | 113411875 | 113414694 | L1PA6:L1:LINE    | 31.99324918 | -1.963896603   | 0.574529716 | -3.418268105 | 0.00063021  | 0.027565948 |
| 1   | 203313873 | 203314940 | L1PA6:L1:LINE    | 59.00695805 | -2.357211257   | 0.577779851 | -4.079774075 | 4.51E-05    | 0.004057284 |
| 1   | 108539962 | 108541032 | MER11C:ERVK:LTR  | 32.14418849 | -3.537497508   | 0.714849322 | -4.948591818 | 7.48E-07    | 0.000162124 |
| 1   | 238481484 | 238485117 | MER61-int:ERV1:L | 7.392621535 | 2.556425981    | 0.791281629 | 3.230740973  | 0.001234698 | 0.043497647 |
| 1   | 112956705 | 112956908 | MIR:MIR:SINE     | 15.88792149 | -2.306073031   | 0.692030763 | -3.332327339 | 0.000861229 | 0.034003844 |
| 1   | 108535475 | 108536858 | SVA_D:SVA:Retro  | 63.56501267 | -2.792407644   | 0.664122547 | -4.204657191 | 2.61E-05    | 0.00261738  |
| 1   | 109176604 | 109177644 | SVA_D:SVA:Retro  | 109.94853   | -2.064922364   | 0.609332876 | -3.388824806 | 0.000701928 | 0.029425405 |
| 1   | 145465616 | 145465780 | U1:snRNA:snRNA   | 44.92314866 | -1.979201736   | 0.563433064 | -3.512753979 | 0.000443488 | 0.021915461 |
| 2   | 99548467  | 99548746  | AluJo:Alu:SINE   | 51.70843005 | -1.915983452   | 0.514481021 | -3.724109097 | 0.000196006 | 0.011932687 |
| 2   | 212372467 | 212372778 | AluSc:Alu:SINE   | 68.26249316 | -2.340433017   | 0.550853467 | -4.248739741 | 2.15E-05    | 0.002325211 |
| 2   | 212514524 | 212514805 | AluSc:Alu:SINE   | 36.87545563 | -2.387346793   | 0.576906462 | -4.138186952 | 3.50E-05    | 0.003302948 |
| 2   | 100001412 | 100001726 | AluSg:Alu:SINE   | 14.63545048 | -2.841799116   | 0.749867448 | -3.78973527  | 0.000150808 | 0.010005592 |
| 2   | 99700123  | 99700418  | AluSg:Alu:SINE   | 7.203128679 | -2.849842401   | 0.826596809 | -3.447681347 | 0.000565421 | 0.025779056 |
| 2   | 100082798 | 100083115 | AluSp:Alu:SINE   | 19.73163713 | -3.295948162   | 0.698768963 | -4.716792439 | 2.40E-06    | 0.000413409 |
| 2   | 99824120  | 99824414  | AluSp:Alu:SINE   | 15.92456613 | -3.595243685   | 0.753108953 | -4.773869267 | 1.81E-06    | 0.000337968 |
| 2   | 99929110  | 99929357  | AluSp:Alu:SINE   | 19.42356635 | -2.839421434   | 0.693125233 | -4.096548936 | 4.19E-05    | 0.003829495 |
| 2   | 100062968 | 100063273 | AluSq:Alu:SINE   | 19.54447373 | -3.148967104   | 0.689011226 | -4.570269667 | 4.87E-06    | 0.000724406 |
| 2   | 100038710 | 100039023 | AluSq2:Alu:SINE  | 12.31146035 | -2.661333226   | 0.751540409 | -3.541171164 | 0.000398355 | 0.020122376 |
| 2   | 212496898 | 212497197 | AluSq2:Alu:SINE  | 34.74816044 | -1.931112125   | 0.583810593 | -3.307771643 | 0.000940415 | 0.036214658 |
| 2   | 99839116  | 99839409  | AluSq2:Alu:SINE  | 9.386133874 | -3.07624802    | 0.819143594 | -3.755444153 | 0.000173034 | 0.011006182 |
| 2   | 99993792  | 99994105  | AluSq2:Alu:SINE  | 17.84694133 | -2.973310833   | 0.756873768 | -3.928410466 | 8.55E-05    | 0.006513505 |
| 2   | 102176983 | 102177271 | AluSx:Alu:SINE   | 78.51116338 | 2.580937921    | 0.70622715  | 3.654543615  | 0.00025764  | 0.014342871 |
| 2   | 99549302  | 99549592  | AluSx:Alu:SINE   | 122.9012594 | -1.691669503   | 0.437664522 | -3.865219636 | 0.000110989 | 0.00801416  |
| 2   | 99724267  | 99724572  | AluSx:Alu:SINE   | 8.669803563 | -2.578960151   | 0.802118706 | -3.215185148 | 0.001303604 | 0.045056061 |

|   |           |           |                   |             |              |             |              |             |             |
|---|-----------|-----------|-------------------|-------------|--------------|-------------|--------------|-------------|-------------|
| 2 | 100057042 | 100057344 | AluSx1:Alu:SINE   | 22.89280246 | -2.288480989 | 0.660966595 | -3.46232473  | 0.000535531 | 0.024889678 |
| 2 | 100058970 | 100059279 | AluSx1:Alu:SINE   | 22.32028871 | -2.425867417 | 0.654541468 | -3.706208905 | 0.000210385 | 0.012632372 |
| 2 | 154857598 | 154857936 | AluSx1:Alu:SINE   | 20.71391176 | -2.912871402 | 0.676338936 | -4.30682199  | 1.66E-05    | 0.001867284 |
| 2 | 99931626  | 99931915  | AluSx1:Alu:SINE   | 17.2373349  | -2.993087236 | 0.675828584 | -4.428766861 | 9.48E-06    | 0.001259518 |
| 2 | 99958209  | 99958500  | AluSz:Alu:SINE    | 11.26171641 | -3.529651909 | 0.796567401 | -4.431077529 | 9.38E-06    | 0.00125142  |
| 2 | 99991620  | 99991927  | AluSz:Alu:SINE    | 17.991769   | -3.219260842 | 0.761950223 | -4.225027754 | 2.39E-05    | 0.002463413 |
| 2 | 100010993 | 100011286 | AluY:Alu:SINE     | 16.2113818  | -2.967672082 | 0.726316002 | -4.085924136 | 4.39E-05    | 0.003962701 |
| 2 | 100078939 | 100079245 | AluY:Alu:SINE     | 26.21954974 | -3.405231588 | 0.682780181 | -4.987302919 | 6.12E-07    | 0.000135618 |
| 2 | 131545573 | 131545872 | AluY:Alu:SINE     | 15.72574102 | -2.386874127 | 0.671237039 | -3.555933284 | 0.00037664  | 0.019252582 |
| 2 | 131624093 | 131624426 | AluY:Alu:SINE     | 9.867620063 | -3.014104655 | 0.781016994 | -3.859204958 | 0.000113757 | 0.008148462 |
| 2 | 167999451 | 167999761 | AluY:Alu:SINE     | 10.24851283 | -2.97669651  | 0.786772067 | -3.783429326 | 0.000154682 | 0.010191734 |
| 2 | 212446989 | 212447296 | AluY:Alu:SINE     | 35.47969879 | -2.153003258 | 0.623512541 | -3.453023183 | 0.000554341 | 0.025572578 |
| 2 | 212483746 | 212484035 | AluY:Alu:SINE     | 34.46140738 | -2.319386491 | 0.631405775 | -3.673369145 | 0.000239373 | 0.013692064 |
| 2 | 212513530 | 212513839 | AluY:Alu:SINE     | 50.0291863  | -1.917823328 | 0.585888813 | -3.273357135 | 0.001062781 | 0.039095069 |
| 2 | 99871925  | 99872232  | AluY:Alu:SINE     | 9.14428218  | -2.787318453 | 0.798565915 | -3.49040499  | 0.000482289 | 0.023280324 |
| 2 | 99873892  | 99874191  | AluY:Alu:SINE     | 11.17244765 | -2.582555812 | 0.730976766 | -3.533020381 | 0.000410841 | 0.020595456 |
| 2 | 99891828  | 99892121  | AluY:Alu:SINE     | 15.12010259 | -3.1645275   | 0.750808304 | -4.214827519 | 2.50E-05    | 0.002532402 |
| 2 | 99985918  | 99986201  | AluY:Alu:SINE     | 10.36905226 | -2.749358263 | 0.809419764 | -3.396702655 | 0.00068203  | 0.029259715 |
| 2 | 99995379  | 99995660  | AluY:Alu:SINE     | 20.61641411 | -3.471908908 | 0.742175887 | -4.678013622 | 2.90E-06    | 0.000476137 |
| 2 | 212206586 | 212206887 | AluYk4:Alu:SINE   | 11.37882206 | -2.523929941 | 0.764185356 | -3.302771928 | 0.000957342 | 0.036595781 |
| 2 | 212440548 | 212446198 | HERVL-int:ERVL:LT | 185.6685173 | -1.866890594 | 0.535056512 | -3.489146573 | 0.000484565 | 0.023354107 |
| 2 | 142405101 | 142405736 | L1P3:L1:LINE      | 9.500402811 | 4.005879058  | 0.833195954 | 4.807847468  | 1.53E-06    | 0.000288771 |
| 2 | 99773691  | 99775704  | L1PA11:L1:LINE    | 14.72913535 | -2.856598744 | 0.74664918  | -3.825891491 | 0.0001303   | 0.008924099 |
| 2 | 131628202 | 131629531 | L1PA12:L1:LINE    | 148.7437766 | -2.838531979 | 0.481380995 | -5.896643218 | 3.71E-09    | 1.68E-06    |
| 2 | 131630168 | 131630732 | L1PA13:L1:LINE    | 55.45053414 | -2.691720283 | 0.503871909 | -5.342072529 | 9.19E-08    | 2.59E-05    |
| 2 | 131632613 | 131633124 | L1PA13:L1:LINE    | 14.48839153 | -2.750206148 | 0.690281158 | -3.984182553 | 6.77E-05    | 0.005507132 |
| 2 | 99626574  | 99628545  | L1PA13:L1:LINE    | 17.11044305 | -2.918662228 | 0.690862302 | -4.22466564  | 2.39E-05    | 0.002463413 |
| 2 | 211888536 | 211894571 | L1PA2:L1:LINE     | 126.6825686 | -1.762947711 | 0.481248821 | -3.663276943 | 0.000249009 | 0.014037549 |
| 2 | 94496017  | 94499162  | L1PA2:L1:LINE     | 96.72978443 | -1.447273145 | 0.395922401 | -3.655446478 | 0.000256735 | 0.014318006 |
| 2 | 131613928 | 131617597 | L1PA3:L1:LINE     | 158.1340269 | -3.295579056 | 0.422213404 | -7.80548184  | 5.93E-15    | 9.26E-12    |
| 2 | 137309506 | 137315534 | L1PA3:L1:LINE     | 8.27108607  | 2.582096873  | 0.786561566 | 3.282765121  | 0.001027943 | 0.038264219 |
| 2 | 99739814  | 99741137  | L1PA3:L1:LINE     | 38.40467986 | -3.034074933 | 0.640778613 | -4.734981584 | 2.19E-06    | 0.000395487 |
| 2 | 99954339  | 99954925  | L1PA3:L1:LINE     | 38.97875601 | -3.287193372 | 0.618057817 | -5.318585543 | 1.05E-07    | 2.79E-05    |
| 2 | 131631502 | 131632587 | L1PA4:L1:LINE     | 30.70256688 | -2.359346586 | 0.601896818 | -3.919852235 | 8.86E-05    | 0.006680244 |

|   |           |           |                   |             |              |             |              |             |             |
|---|-----------|-----------|-------------------|-------------|--------------|-------------|--------------|-------------|-------------|
| 2 | 132528881 | 132535004 | L1PA4:L1:LINE     | 41.80733634 | -2.374457441 | 0.699768136 | -3.393206003 | 0.000690797 | 0.029302027 |
| 2 | 142430238 | 142432791 | L1PA4:L1:LINE     | 22.01313091 | 3.49905705   | 0.796948953 | 4.39056609   | 1.13E-05    | 0.00142373  |
| 2 | 99908220  | 99909403  | L1PA4:L1:LINE     | 83.96355148 | -3.633800419 | 0.544476877 | -6.673929733 | 2.49E-11    | 1.65E-08    |
| 2 | 11844304  | 11846272  | L1PA5:L1:LINE     | 11.74538532 | -2.991980427 | 0.826275088 | -3.621046393 | 0.000293414 | 0.015637558 |
| 2 | 154767186 | 154769784 | L1PA5:L1:LINE     | 23.35848264 | -2.608093025 | 0.77680479  | -3.357462592 | 0.000786614 | 0.031739971 |
| 2 | 234775486 | 234781643 | L1PA5:L1:LINE     | 8.42012361  | -2.587274332 | 0.813322467 | -3.181117499 | 0.001467081 | 0.048889838 |
| 2 | 154838950 | 154845084 | L1PA6:L1:LINE     | 19.13850544 | -2.562529957 | 0.793908283 | -3.227740547 | 0.001247721 | 0.043699051 |
| 2 | 168100710 | 168101366 | L1PA7:L1:LINE     | 25.50049373 | -2.897207372 | 0.618301589 | -4.685751137 | 2.79E-06    | 0.000463373 |
| 2 | 212234004 | 212237135 | L1PA7:L1:LINE     | 287.9686235 | -1.993691691 | 0.50449325  | -3.951869904 | 7.75E-05    | 0.006100106 |
| 2 | 212237134 | 212238540 | L1PA7:L1:LINE     | 69.34504875 | -1.895983654 | 0.55625632  | -3.408471211 | 0.00065328  | 0.028415851 |
| 2 | 212274815 | 212275555 | L1PA7:L1:LINE     | 77.84186976 | -1.760037886 | 0.511471627 | -3.441125166 | 0.0005793   | 0.026120762 |
| 2 | 99829200  | 99830299  | L1PA8:L1:LINE     | 45.05116581 | -3.596462716 | 0.579891773 | -6.201955063 | 5.58E-10    | 3.06E-07    |
| 2 | 99933334  | 99933819  | L1PA8:L1:LINE     | 18.6711757  | -3.114345533 | 0.740356464 | -4.206548716 | 2.59E-05    | 0.002612324 |
| 2 | 101098390 | 101102007 | L1PA8A:L1:LINE    | 23.93197312 | -2.730161862 | 0.6654552   | -4.102698213 | 4.08E-05    | 0.003740024 |
| 2 | 100025210 | 100026690 | L1PB1:L1:LINE     | 29.30702687 | -2.798628482 | 0.601142802 | -4.655513588 | 3.23E-06    | 0.00052026  |
| 2 | 154857401 | 154857585 | L2a:L2:LINE       | 16.20774257 | -2.321124716 | 0.675070385 | -3.438344751 | 0.000585282 | 0.026300638 |
| 2 | 99940301  | 99940854  | MER41A:ERV1:LTR   | 27.08296797 | -2.654733242 | 0.641431785 | -4.138761605 | 3.49E-05    | 0.003302948 |
| 2 | 131630732 | 131631257 | MER4-int:ERV1:LTR | 19.08693138 | -2.204646526 | 0.675382706 | -3.264292238 | 0.001097379 | 0.039897843 |
| 2 | 26780450  | 26780632  | MIRb:MIR:SINE     | 110.5711288 | 1.20320392   | 0.376063577 | 3.199469432  | 0.001376808 | 0.046285346 |
| 2 | 212440122 | 212440548 | MLT2A1:ERV.L:LTR  | 52.13975943 | -2.352500904 | 0.600030615 | -3.92063479  | 8.83E-05    | 0.006678445 |
| 2 | 212459913 | 212460266 | THE1B:ERV.L-MaLR  | 50.05929098 | -2.313170189 | 0.510233277 | -4.53355415  | 5.80E-06    | 0.000845019 |
| 2 | 99927822  | 99928194  | THE1B:ERV.L-MaLR  | 13.1619006  | -3.286515295 | 0.758723904 | -4.331635364 | 1.48E-05    | 0.001705673 |
| 2 | 168080643 | 168081664 | THE1B-int:ERV.L-M | 13.1184186  | -2.24074947  | 0.703852297 | -3.183550695 | 0.001454806 | 0.048541728 |
| 2 | 212460266 | 212461716 | THE1B-int:ERV.L-M | 161.414502  | -2.216071631 | 0.518236198 | -4.276180704 | 1.90E-05    | 0.002090794 |
| 2 | 212466712 | 212468298 | THE1B-int:ERV.L-M | 198.172084  | -1.853782934 | 0.505641939 | -3.666196945 | 0.000246184 | 0.013928593 |
| 2 | 212505908 | 212508318 | Tigger1:TcMar-Tig | 26.54065021 | -1.941738031 | 0.604092959 | -3.214303367 | 0.001307614 | 0.045124979 |
| 3 | 112603244 | 112603521 | AluSx1:Alu:SINE   | 16.54200674 | 2.483332756  | 0.7743086   | 3.207161533  | 0.001340517 | 0.045650742 |
| 3 | 23266649  | 23269368  | L1P1:L1:LINE      | 59.42767406 | -2.314990071 | 0.603966585 | -3.832977071 | 0.000126602 | 0.008825669 |
| 3 | 141757129 | 141763153 | L1PA2:L1:LINE     | 30.93556223 | 2.217229305  | 0.547624705 | 4.048811689  | 5.15E-05    | 0.004503418 |
| 3 | 53365276  | 53371325  | L1PA2:L1:LINE     | 64.92743036 | 2.010388017  | 0.520158809 | 3.864950439  | 0.000111112 | 0.00801416  |
| 3 | 100509607 | 100515641 | L1PA3:L1:LINE     | 47.52863541 | -2.231842053 | 0.584191232 | -3.820396355 | 0.000133237 | 0.009085452 |
| 3 | 189017229 | 189025537 | L1PA3:L1:LINE     | 69.76882745 | 2.462442865  | 0.452137439 | 5.446226415  | 5.14E-08    | 1.61E-05    |
| 3 | 23349243  | 23355385  | L1PA3:L1:LINE     | 198.2402297 | -2.190832986 | 0.60256096  | -3.635869453 | 0.000277045 | 0.015112278 |
| 3 | 125849810 | 125855962 | L1PA4:L1:LINE     | 33.29387085 | -2.236420555 | 0.600145697 | -3.726462698 | 0.000194186 | 0.011874896 |

|   |           |           |                   |             |              |             |              |             |             |
|---|-----------|-----------|-------------------|-------------|--------------|-------------|--------------|-------------|-------------|
| 3 | 23296317  | 23301810  | L1PA4:L1:LINE     | 83.39515361 | -1.917282719 | 0.503295416 | -3.80945794  | 0.000139272 | 0.009414713 |
| 3 | 55831626  | 55837762  | L1PA4:L1:LINE     | 8.229961365 | -2.771023099 | 0.831803725 | -3.331342497 | 0.000864282 | 0.034038322 |
| 3 | 56213069  | 56219149  | L1PA4:L1:LINE     | 8.700205724 | -2.738887359 | 0.833557955 | -3.285779164 | 0.001017007 | 0.038038501 |
| 3 | 15480181  | 15484403  | L1PA5:L1:LINE     | 22.38442707 | -2.061507719 | 0.643192553 | -3.205117517 | 0.001350073 | 0.04578083  |
| 3 | 187052299 | 187058423 | L1PA6:L1:LINE     | 72.8015667  | -2.97273917  | 0.583507085 | -5.094606816 | 3.49E-07    | 8.36E-05    |
| 3 | 23347104  | 23347712  | L1PA6:L1:LINE     | 8.31982778  | -3.024499555 | 0.820377771 | -3.686715636 | 0.000227167 | 0.013138243 |
| 4 | 140729574 | 140729845 | AluSc:Alu:SINE    | 27.02585621 | -2.485797274 | 0.721003488 | -3.447691052 | 0.0005654   | 0.025779056 |
| 4 | 140664826 | 140665128 | AluSg:Alu:SINE    | 26.13362751 | -2.058266459 | 0.604308373 | -3.405986993 | 0.000659253 | 0.028635795 |
| 4 | 39502913  | 39503213  | AluSg:Alu:SINE    | 13.81362238 | -2.920275116 | 0.775993269 | -3.763273771 | 0.000167703 | 0.010776844 |
| 4 | 140682882 | 140683177 | AluSp:Alu:SINE    | 7.403312641 | -2.813657171 | 0.828624003 | -3.395577681 | 0.000684839 | 0.029259715 |
| 4 | 140624780 | 140625065 | AluSq2:Alu:SINE   | 15.75906709 | -2.204389842 | 0.685959643 | -3.213585325 | 0.001310888 | 0.045188031 |
| 4 | 89239666  | 89239961  | AluSx:Alu:SINE    | 12.99565091 | -3.219714566 | 0.77934838  | -4.13129051  | 3.61E-05    | 0.003383193 |
| 4 | 140712461 | 140712748 | AluSx3:Alu:SINE   | 11.48371901 | -2.528742035 | 0.791457618 | -3.195044154 | 0.001398094 | 0.046950418 |
| 4 | 140725985 | 140726301 | AluSz:Alu:SINE    | 13.65153606 | -2.723327686 | 0.796576227 | -3.418791065 | 0.000629    | 0.027551614 |
| 4 | 139046568 | 139046874 | AluY:Alu:SINE     | 46.90234018 | -1.838431796 | 0.512060789 | -3.590260837 | 0.000330347 | 0.01742749  |
| 4 | 140660910 | 140661213 | AluY:Alu:SINE     | 32.61093986 | -1.813834256 | 0.564931935 | -3.210712909 | 0.001324061 | 0.045449684 |
| 4 | 174984912 | 174989048 | HERVK9-int:ERVK:  | 8.845753404 | 2.858686809  | 0.83655509  | 3.417212857  | 0.000632658 | 0.027634322 |
| 4 | 174979694 | 174982832 | HERVL-int:ERVL:LT | 9.720190341 | 3.685757008  | 0.796805376 | 4.625667845  | 3.73E-06    | 0.000580171 |
| 4 | 74449070  | 74449168  | L1MEf:L1:LINE     | 32.0076003  | 2.263077902  | 0.712045218 | 3.17827835   | 0.001481524 | 0.049118355 |
| 4 | 86251145  | 86254837  | L1PA2:L1:LINE     | 8.117942138 | -2.724838852 | 0.833178423 | -3.270414566 | 0.0010739   | 0.039318831 |
| 4 | 95171232  | 95177256  | L1PA3:L1:LINE     | 147.1141744 | -1.583059167 | 0.42427877  | -3.731176947 | 0.000190587 | 0.011786598 |
| 4 | 95480626  | 95483004  | L1PA3:L1:LINE     | 32.08859736 | -3.046054889 | 0.822645688 | -3.702754339 | 0.000213271 | 0.012667234 |
| 4 | 4013498   | 4019703   | L1PA4:L1:LINE     | 13.94298505 | -2.536074046 | 0.713713203 | -3.553351731 | 0.000380356 | 0.01939125  |
| 4 | 9080578   | 9086679   | L1PA4:L1:LINE     | 68.54598228 | -1.55905715  | 0.451810599 | -3.450687418 | 0.000559161 | 0.025605792 |
| 4 | 95133878  | 95140064  | L1PA5:L1:LINE     | 157.5772485 | -2.004470373 | 0.458413807 | -4.372622168 | 1.23E-05    | 0.001509485 |
| 4 | 38824163  | 38824458  | L2a:L2:LINE       | 11.41212366 | -3.503963241 | 0.79872719  | -4.386933718 | 1.15E-05    | 0.001441891 |
| 4 | 75047494  | 75047704  | MER20:hAT-Charli  | 9.432317781 | -2.705565746 | 0.79596026  | -3.39912164  | 0.000676026 | 0.029201911 |
| 4 | 174983875 | 174984522 | SVA_A:SVA:Retrog  | 8.062451314 | 3.239702159  | 0.826579961 | 3.919405639  | 8.88E-05    | 0.006680244 |
| 4 | 150963149 | 150964838 | SVA_B:SVA:Retrog  | 78.13113424 | -2.3413167   | 0.720802642 | -3.248207712 | 0.001161345 | 0.041689601 |
| 4 | 98366453  | 98368013  | THE1B-int:ERVL-M  | 34.32749732 | -2.020713757 | 0.577057093 | -3.50175707  | 0.000462201 | 0.022591795 |
| 5 | 70110690  | 70110972  | AluJb:Alu:SINE    | 7.397762784 | -2.870079912 | 0.826040496 | -3.474502675 | 0.000511801 | 0.024072006 |
| 5 | 69652415  | 69652519  | AluSq2:Alu:SINE   | 9.587275347 | -3.129008925 | 0.81682673  | -3.830688702 | 0.000127785 | 0.008842895 |
| 5 | 95794820  | 95795118  | AluSz:Alu:SINE    | 67.12058965 | 1.508223359  | 0.445316025 | 3.38686073   | 0.000706973 | 0.029491397 |
| 5 | 132822351 | 132822661 | AluY:Alu:SINE     | 118.331848  | -2.720379111 | 0.763308197 | -3.563932789 | 0.00036534  | 0.018890595 |

|   |           |           |                  |             |              |             |              |             |             |
|---|-----------|-----------|------------------|-------------|--------------|-------------|--------------|-------------|-------------|
| 5 | 15813202  | 15814587  | L1PA7:L1:LINE    | 16.15191985 | -2.384358579 | 0.669640074 | -3.560656945 | 0.000369928 | 0.01903332  |
| 5 | 15870695  | 15872406  | L1PA7:L1:LINE    | 21.38828924 | -3.209846051 | 0.743723415 | -4.315913668 | 1.59E-05    | 0.001798545 |
| 5 | 15872433  | 15876411  | L1PA7:L1:LINE    | 33.93529087 | -3.062889998 | 0.601461142 | -5.092415425 | 3.54E-07    | 8.36E-05    |
| 5 | 151661901 | 151662129 | L2a:L2:LINE      | 71.65109192 | 2.435794584  | 0.743932564 | 3.274214225  | 0.001059563 | 0.039022638 |
| 5 | 139475741 | 139475954 | LTR33:ERVL:LTR   | 81.84887548 | 1.300101551  | 0.384545346 | 3.380879696  | 0.000722542 | 0.03000758  |
| 5 | 151661681 | 151661886 | MER3:hAT-Charlie | 65.73974018 | 2.348205398  | 0.730245933 | 3.215636394  | 0.001301556 | 0.045056061 |
| 5 | 43665240  | 43666629  | SVA_B:SVA:Retrog | 12.76006212 | -3.220336559 | 0.816436642 | -3.944380242 | 8.00E-05    | 0.006169597 |
| 5 | 70528190  | 70528393  | THE1B:ERVL-MaLF  | 14.0350303  | -2.787281124 | 0.764395005 | -3.646388456 | 0.000265952 | 0.014681215 |
| 5 | 15743104  | 15744696  | THE1C-int:ERVL-M | 18.24724328 | -2.876264387 | 0.721447657 | -3.98679566  | 6.70E-05    | 0.005489742 |
| 6 | 87086803  | 87087087  | AluSx1:Alu:SINE  | 14.26700558 | -2.879768039 | 0.716710265 | -4.018036549 | 5.87E-05    | 0.004980419 |
| 6 | 30806190  | 30806502  | AluSz:Alu:SINE   | 21.73769007 | -3.767946927 | 0.703140217 | -5.35874188  | 8.38E-08    | 2.40E-05    |
| 6 | 31869703  | 31869997  | AluY:Alu:SINE    | 14.09074681 | -2.306089062 | 0.707488144 | -3.259544461 | 0.001115913 | 0.040386189 |
| 6 | 151867443 | 151867765 | L1P3:L1:LINE     | 24.12892487 | -2.344954423 | 0.63567117  | -3.688942547 | 0.000225188 | 0.013096552 |
| 6 | 151931455 | 151933731 | L1PA2:L1:LINE    | 64.74577009 | -2.239079534 | 0.517938498 | -4.323060639 | 1.54E-05    | 0.001765193 |
| 6 | 151863059 | 151863690 | L1PA5:L1:LINE    | 56.21315912 | -1.874129699 | 0.577504824 | -3.245219124 | 0.001173603 | 0.041984866 |
| 6 | 115935045 | 115941505 | L1PA7:L1:LINE    | 86.03840722 | 1.863500525  | 0.493170488 | 3.778613216  | 0.000157704 | 0.010303888 |
| 6 | 151866336 | 151866866 | L1PA7:L1:LINE    | 50.19872659 | -2.367512628 | 0.584025229 | -4.053784852 | 5.04E-05    | 0.004446056 |
| 6 | 151967187 | 151968062 | L1PA7:L1:LINE    | 88.21015852 | -1.804766719 | 0.469991742 | -3.839996663 | 0.000123036 | 0.008673898 |
| 6 | 151968061 | 151968548 | L1PA7:L1:LINE    | 31.92917846 | -2.356681372 | 0.567241267 | -4.154636672 | 3.26E-05    | 0.003140497 |
| 6 | 71355361  | 71361788  | L1PA7:L1:LINE    | 19.56166275 | -2.419071998 | 0.728701582 | -3.319701863 | 0.000901136 | 0.035004213 |
| 6 | 165764432 | 165765849 | LTR12C:ERV1:LTR  | 13.83326113 | -2.703916367 | 0.837380973 | -3.229015771 | 0.00124217  | 0.04359241  |
| 6 | 30806717  | 30808005  | LTR12C:ERV1:LTR  | 129.61572   | -3.366254566 | 0.435856213 | -7.723314398 | 1.13E-14    | 1.54E-11    |
| 6 | 165780893 | 165781351 | MSTB2:ERVL-MaLF  | 7.589596983 | -2.767007426 | 0.830834424 | -3.33039574  | 0.000867226 | 0.034111267 |
| 6 | 151898400 | 151900119 | SVA_D:SVA:Retrog | 473.252307  | -2.521634192 | 0.533434388 | -4.727168414 | 2.28E-06    | 0.000404002 |
| 6 | 53304468  | 53306203  | SVA_D:SVA:Retrog | 76.20455454 | -1.884718099 | 0.574828261 | -3.278749891 | 0.00104268  | 0.03860703  |
| 7 | 17345034  | 17345326  | AluSc:Alu:SINE   | 117.4200707 | -2.281784149 | 0.538608629 | -4.236441871 | 2.27E-05    | 0.002396026 |
| 7 | 17310536  | 17310835  | AluSq2:Alu:SINE  | 25.14512779 | -3.372733103 | 0.649580408 | -5.192171842 | 2.08E-07    | 5.36E-05    |
| 7 | 17344621  | 17344927  | AluSx:Alu:SINE   | 144.8851432 | -2.41402574  | 0.547912352 | -4.405861144 | 1.05E-05    | 0.001359767 |
| 7 | 17324520  | 17324815  | AluSx3:Alu:SINE  | 17.86729731 | -2.669999077 | 0.662279563 | -4.03152872  | 5.54E-05    | 0.004780864 |
| 7 | 8461548   | 8461858   | AluYb8:Alu:SINE  | 9.4706935   | -2.818643791 | 0.798016954 | -3.532060036 | 0.000412336 | 0.020637271 |
| 7 | 64990915  | 64999343  | HERV3-int:ERV1:L | 267.4350388 | 1.377353752  | 0.314690772 | 4.376848239  | 1.20E-05    | 0.001492244 |
| 7 | 8672103   | 8672480   | L1PA3:L1:LINE    | 7.346004207 | -2.755446349 | 0.831025973 | -3.315716281 | 0.000914086 | 0.035331452 |
| 7 | 8726340   | 8732368   | L1PA3:L1:LINE    | 63.40153892 | -3.25925388  | 0.510020537 | -6.390436554 | 1.65E-10    | 9.93E-08    |
| 7 | 65480283  | 65486433  | L1PA4:L1:LINE    | 178.0582268 | 2.898501345  | 0.552683759 | 5.24441201   | 1.57E-07    | 4.11E-05    |



|   |           |           |                 |             |              |             |              |             |             |
|---|-----------|-----------|-----------------|-------------|--------------|-------------|--------------|-------------|-------------|
| 7 | 8496881   | 8497980   | L1PA5:L1:LINE   | 98.91197211 | -3.480512998 | 0.466546403 | -7.460164679 | 8.64E-14    | 1.04E-10    |
| 7 | 8732890   | 8734564   | L1PA7:L1:LINE   | 12.82826747 | -3.01509641  | 0.733679971 | -4.109552572 | 3.96E-05    | 0.00364141  |
| 7 | 8734830   | 8739610   | L1PA7:L1:LINE   | 21.98425616 | -4.008450655 | 0.720741639 | -5.561563862 | 2.67E-08    | 8.91E-06    |
| 7 | 73749695  | 73750685  | LTR5B:ERVK:LTR  | 39.36939904 | -2.095335562 | 0.578239131 | -3.623648851 | 0.000290476 | 0.01556064  |
| 7 | 131503890 | 131504051 | MIR3:MIR:SINE   | 14.93608663 | 2.786532284  | 0.820994744 | 3.394092722  | 0.000688564 | 0.029302027 |
| 7 | 8524931   | 8526510   | THE1A-int:ERVLM | 78.8030321  | -2.440823613 | 0.554473503 | -4.402056367 | 1.07E-05    | 0.001378144 |
| 8 | 128015494 | 128015790 | AluSc:Alu:SINE  | 39.76038166 | -2.569142923 | 0.644031874 | -3.989154923 | 6.63E-05    | 0.005449736 |
| 8 | 127950898 | 127951191 | AluSg:Alu:SINE  | 18.3613705  | -2.293554497 | 0.685454216 | -3.346036019 | 0.000819757 | 0.032655415 |
| 8 | 133521310 | 133521597 | AluSg4:Alu:SINE | 26.75049443 | -1.861035352 | 0.575639869 | -3.232985505 | 0.001225038 | 0.043279587 |
| 8 | 127804927 | 127805229 | AluSp:Alu:SINE  | 116.7582309 | -1.51489764  | 0.450548111 | -3.362343783 | 0.000772838 | 0.031392298 |
| 8 | 127934971 | 127935252 | AluSp:Alu:SINE  | 23.0821831  | -1.994739759 | 0.608329225 | -3.279046405 | 0.001041585 | 0.03860703  |
| 8 | 127925635 | 127925938 | AluSq:Alu:SINE  | 21.28200273 | -2.03198308  | 0.632020357 | -3.215059542 | 0.001304175 | 0.045056061 |
| 8 | 127816510 | 127816783 | AluSq2:Alu:SINE | 22.81071578 | -1.81580662  | 0.571524514 | -3.177128148 | 0.001487413 | 0.049209104 |
| 8 | 128042790 | 128043063 | AluSx:Alu:SINE  | 39.03668157 | -2.111328214 | 0.58216805  | -3.626664523 | 0.000287106 | 0.015486364 |
| 8 | 132674608 | 132674905 | AluSx:Alu:SINE  | 18.17249007 | 2.879484406  | 0.678715332 | 4.242550993  | 2.21E-05    | 0.002360711 |
| 8 | 127808747 | 127809059 | AluSx1:Alu:SINE | 21.42932521 | -2.568469056 | 0.770949405 | -3.331566299 | 0.000863587 | 0.034038322 |
| 8 | 133497456 | 133497771 | AluSx1:Alu:SINE | 30.21166423 | -2.332792322 | 0.631103578 | -3.696369981 | 0.000218704 | 0.012790918 |
| 8 | 133538232 | 133538541 | AluSx1:Alu:SINE | 53.14934287 | -1.898109848 | 0.468785597 | -4.048993528 | 5.14E-05    | 0.004503418 |
| 8 | 127841263 | 127841552 | AluSz:Alu:SINE  | 28.85593705 | -1.999460011 | 0.607067988 | -3.293634403 | 0.00098901  | 0.037494645 |
| 8 | 127983876 | 127984176 | AluSz:Alu:SINE  | 82.68020845 | -1.557196838 | 0.474074249 | -3.284710866 | 0.001020871 | 0.038091774 |
| 8 | 128060905 | 128061208 | AluSz:Alu:SINE  | 24.09739389 | -2.257070095 | 0.672779617 | -3.354843159 | 0.0007941   | 0.031918321 |
| 8 | 127992104 | 127992388 | AluSz6:Alu:SINE | 26.13992628 | -2.230567991 | 0.595904636 | -3.743162676 | 0.000181718 | 0.011396085 |
| 8 | 128015105 | 128015386 | AluSz6:Alu:SINE | 22.80241125 | -2.188288179 | 0.653023352 | -3.351010609 | 0.000805172 | 0.032197609 |
| 8 | 127821529 | 127821830 | AluY:Alu:SINE   | 50.90755642 | -2.046553696 | 0.627547606 | -3.261192737 | 0.001109446 | 0.040279758 |
| 8 | 127844703 | 127845012 | AluY:Alu:SINE   | 55.74493112 | -1.938668119 | 0.599385155 | -3.234427986 | 0.001218867 | 0.04321853  |
| 8 | 127924501 | 127924810 | AluY:Alu:SINE   | 40.63453373 | -1.963463912 | 0.589867985 | -3.328649736 | 0.000872681 | 0.034282634 |
| 8 | 127929516 | 127929782 | AluY:Alu:SINE   | 23.49727135 | -2.396515717 | 0.732640893 | -3.27106464  | 0.001071434 | 0.039310706 |
| 8 | 127952770 | 127953063 | AluY:Alu:SINE   | 42.04203305 | -2.067676212 | 0.587420013 | -3.519928103 | 0.000431664 | 0.02150449  |
| 8 | 128021290 | 128021592 | AluY:Alu:SINE   | 83.88569388 | -1.886952158 | 0.572283869 | -3.297231076 | 0.000976431 | 0.037188935 |
| 8 | 103602996 | 103609018 | L1PA2:L1:LINE   | 44.87095122 | -2.235040291 | 0.639311179 | -3.496013153 | 0.000472265 | 0.022957091 |
| 8 | 103783269 | 103789216 | L1PA2:L1:LINE   | 25.02680944 | -3.221388559 | 0.696585269 | -4.624543044 | 3.75E-06    | 0.000580441 |
| 8 | 103751167 | 103756353 | L1PA4:L1:LINE   | 15.76465339 | -2.952624345 | 0.741004143 | -3.984625963 | 6.76E-05    | 0.005507132 |
| 8 | 103549090 | 103553602 | L1PA5:L1:LINE   | 114.5497593 | -2.204498317 | 0.608058172 | -3.625472725 | 0.000288433 | 0.015531141 |
| 8 | 103738312 | 103739541 | L1PA5:L1:LINE   | 16.82727945 | -2.544132394 | 0.730400235 | -3.483203142 | 0.000495452 | 0.023646178 |

|    |           |           |                  |             |              |             |              |             |             |
|----|-----------|-----------|------------------|-------------|--------------|-------------|--------------|-------------|-------------|
| 8  | 103790883 | 103795584 | L1PA5:L1:LINE    | 55.70069258 | -2.910162741 | 0.605030513 | -4.809943762 | 1.51E-06    | 0.000288771 |
| 8  | 140382163 | 140388390 | L1PA5:L1:LINE    | 51.32639405 | -2.25730648  | 0.605541193 | -3.727750494 | 0.000193197 | 0.011874896 |
| 8  | 103951313 | 103957769 | L1PA7:L1:LINE    | 23.37729314 | -2.488927473 | 0.671783066 | -3.704957148 | 0.000211426 | 0.012632372 |
| 8  | 39179932  | 39181535  | LTR12C:ERV1:LTR  | 23.38025593 | -2.457386627 | 0.756122243 | -3.249985899 | 0.001154107 | 0.041477475 |
| 8  | 128100639 | 128101309 | LTR8A:ERV1:LTR   | 184.674047  | -1.285971541 | 0.34814587  | -3.693772215 | 0.000220952 | 0.012874149 |
| 8  | 130393752 | 130394816 | MER11B:ERVK:LTR  | 11.35434914 | -2.496355074 | 0.77001882  | -3.241940338 | 0.001187189 | 0.042277185 |
| 8  | 127939637 | 127939772 | MIRb:MIR:SINE    | 41.11131823 | -1.905442277 | 0.540674558 | -3.524194453 | 0.000424772 | 0.021225707 |
| 8  | 127947602 | 127947679 | MIRb:MIR:SINE    | 34.92712695 | -2.187265529 | 0.561502861 | -3.895377353 | 9.80E-05    | 0.007238945 |
| 8  | 123209795 | 123210136 | MLT1I:ERVL-MaLR  | 39.45826455 | 1.68752658   | 0.524320848 | 3.21849987   | 0.00128863  | 0.044816495 |
| 8  | 103562119 | 103563698 | THE1B-int:ERVL-M | 18.42307376 | -2.422871677 | 0.684506655 | -3.539588195 | 0.000400752 | 0.020178958 |
| 9  | 63818917  | 63819225  | AluSq:Alu:SINE   | 62.52881299 | -1.74674625  | 0.514874966 | -3.392563954 | 0.000692418 | 0.029302027 |
| 9  | 86157088  | 86163107  | L1PA2:L1:LINE    | 35.42081689 | 1.901636159  | 0.568659084 | 3.344070661  | 0.000825587 | 0.032762274 |
| 9  | 41149958  | 41155994  | L1PA3:L1:LINE    | 42.88441508 | -1.728829645 | 0.531472788 | -3.252903412 | 0.001142323 | 0.041101262 |
| 9  | 68275326  | 68281363  | L1PA3:L1:LINE    | 45.03853583 | -1.650039588 | 0.517836589 | -3.186409811 | 0.001440504 | 0.048115912 |
| 9  | 65291009  | 65292463  | L1PB1:L1:LINE    | 19.00634972 | -2.33484756  | 0.708923314 | -3.293512165 | 0.000989441 | 0.037494645 |
| 9  | 65292463  | 65295683  | L1PB1:L1:LINE    | 16.45006266 | -3.059810798 | 0.773398551 | -3.956318245 | 7.61E-05    | 0.006017996 |
| 9  | 99865852  | 99866047  | MIR3:MIR:SINE    | 24.45718069 | -3.118113836 | 0.761850506 | -4.092815862 | 4.26E-05    | 0.003869068 |
| 10 | 14582364  | 14582676  | AluSc8:Alu:SINE  | 12.19115625 | -2.79847792  | 0.833662128 | -3.356849046 | 0.000788361 | 0.031769439 |
| 10 | 843416    | 843718    | AluSq2:Alu:SINE  | 12.03073306 | -2.402144226 | 0.711045374 | -3.378327622 | 0.000729281 | 0.030127231 |
| 10 | 77820063  | 77820366  | AluSx1:Alu:SINE  | 35.29957323 | -1.771544046 | 0.515784381 | -3.434660123 | 0.000593297 | 0.026508258 |
| 10 | 91749615  | 91755638  | L1PA3:L1:LINE    | 73.81834889 | 1.612068877  | 0.491264733 | 3.281466728  | 0.001032687 | 0.03839506  |
| 10 | 11972382  | 11974769  | L1PA5:L1:LINE    | 38.05986462 | -2.131081502 | 0.503521901 | -4.232351159 | 2.31E-05    | 0.002423661 |
| 10 | 21778609  | 21781440  | L1PA5:L1:LINE    | 14.812017   | -2.201644566 | 0.655496248 | -3.358744726 | 0.000782974 | 0.031633956 |
| 10 | 92375117  | 92375955  | SVA_F:SVA:Retrop | 17.59914333 | -3.020460392 | 0.810125233 | -3.728387008 | 0.000192709 | 0.011870816 |
| 11 | 57994162  | 58000000  | L1PA2:L1:LINE    | 15.93093797 | 2.37230033   | 0.658468418 | 3.602754917  | 0.000314862 | 0.016723583 |
| 11 | 75748616  | 75754649  | L1PA2:L1:LINE    | 21.1988437  | 2.542042673  | 0.596440457 | 4.262022543  | 2.03E-05    | 0.002219976 |
| 11 | 73297944  | 73298234  | L2b:L2:LINE      | 19.66967147 | -2.370976618 | 0.72604793  | -3.265592422 | 0.001092354 | 0.039877726 |
| 11 | 125089312 | 125090854 | LTR12C:ERV1:LTR  | 46.13507898 | -2.753562348 | 0.71756005  | -3.837396394 | 0.000124346 | 0.00872683  |
| 11 | 73272218  | 73272327  | MIRc:MIR:SINE    | 15.59809819 | -2.552649179 | 0.728966849 | -3.501735617 | 0.000462238 | 0.022591795 |
| 11 | 129128567 | 129129672 | SVA_B:SVA:Retrop | 11.63084638 | -3.061384748 | 0.822770688 | -3.720823787 | 0.000198574 | 0.012029751 |
| 11 | 62841623  | 62841809  | U2:snRNA:snRNA   | 175.1824379 | -2.319160974 | 0.714410295 | -3.246259172 | 0.001169323 | 0.041879745 |
| 12 | 116146116 | 116146418 | AluSc:Alu:SINE   | 18.08178402 | -2.812273453 | 0.766901699 | -3.667058579 | 0.000245357 | 0.013928593 |
| 12 | 116206074 | 116206325 | AluSx:Alu:SINE   | 12.72425097 | -2.791505728 | 0.767116953 | -3.638957161 | 0.000273744 | 0.015025148 |
| 12 | 101185569 | 101185870 | AluSx1:Alu:SINE  | 11.66381662 | -2.70967242  | 0.785230861 | -3.450797152 | 0.000558933 | 0.025605792 |

|    |           |           |                  |             |              |             |              |             |             |
|----|-----------|-----------|------------------|-------------|--------------|-------------|--------------|-------------|-------------|
| 12 | 48860077  | 48860380  | AluSz6:Alu:SINE  | 13.57008922 | -2.817755857 | 0.805495096 | -3.498166372 | 0.000468469 | 0.022824881 |
| 12 | 95749284  | 95752709  | HERVH-int:ERV1:L | 13.6094543  | -2.579037054 | 0.780722252 | -3.303398932 | 0.000955204 | 0.036559004 |
| 12 | 101152060 | 101155141 | L1PA2:L1:LINE    | 55.42075839 | -2.996559877 | 0.679524243 | -4.409790976 | 1.03E-05    | 0.001345511 |
| 12 | 8301068   | 8307182   | L1PA4:L1:LINE    | 64.44756617 | -1.585414742 | 0.42382956  | -3.740689397 | 0.000183516 | 0.01148576  |
| 12 | 95775205  | 95781318  | L1PA5:L1:LINE    | 70.53531788 | -2.318945239 | 0.6177383   | -3.753928222 | 0.000174085 | 0.011028074 |
| 12 | 116660542 | 116661920 | LTR12C:ERV1:LTR  | 21.70056664 | -3.055325761 | 0.701431512 | -4.35584331  | 1.33E-05    | 0.001601413 |
| 12 | 122591840 | 122593220 | LTR12C:ERV1:LTR  | 77.26067498 | -1.652397983 | 0.472057091 | -3.500419787 | 0.000464526 | 0.022668144 |
| 12 | 119179222 | 119179304 | MIR3:MIR:SINE    | 54.07432995 | 2.177655468  | 0.497388828 | 4.378175276  | 1.20E-05    | 0.001489098 |
| 12 | 52168981  | 52169353  | MSTB:ERVL-MaLR   | 21.03809531 | 1.964786622  | 0.578944732 | 3.393737801  | 0.000689457 | 0.029302027 |
| 12 | 100293530 | 100295757 | SVA_D:SVA:Retrop | 53.07154223 | -2.665329068 | 0.692580404 | -3.848403812 | 0.00011889  | 0.008457978 |
| 12 | 48915110  | 48916626  | SVA_D:SVA:Retrop | 84.12122183 | -1.821971693 | 0.5435293   | -3.352113108 | 0.000801972 | 0.032151992 |
| 13 | 49158536  | 49163769  | L1P2:L1:LINE     | 78.36712281 | -1.995013936 | 0.556243173 | -3.586585924 | 0.000335036 | 0.017556208 |
| 13 | 96204174  | 96208006  | L1PA11:L1:LINE   | 20.8297162  | -2.06588049  | 0.597861983 | -3.455447161 | 0.000549381 | 0.025418835 |
| 13 | 49013626  | 49019628  | L1PA3:L1:LINE    | 104.5800187 | -2.041546328 | 0.491090924 | -4.157165662 | 3.22E-05    | 0.003115561 |
| 13 | 43710923  | 43716379  | L1PA4:L1:LINE    | 39.15986724 | -2.660410907 | 0.719584854 | -3.69714689  | 0.000218036 | 0.012775775 |
| 13 | 96326180  | 96332208  | L1PA4:L1:LINE    | 46.07123257 | -1.827566777 | 0.530511667 | -3.444913452 | 0.000571242 | 0.025968657 |
| 13 | 49118181  | 49124497  | L1PA7:L1:LINE    | 48.31476876 | -1.786076554 | 0.545482712 | -3.274304602 | 0.001059224 | 0.039022638 |
| 13 | 113621366 | 113622349 | LTR13:ERVK:LTR   | 22.56105623 | -2.161637518 | 0.650999637 | -3.320489589 | 0.000898597 | 0.034992626 |
| 13 | 97358238  | 97358429  | MIR3:MIR:SINE    | 19.41708991 | -2.595336072 | 0.70082055  | -3.70328192  | 0.000212828 | 0.012667234 |
| 14 | 65522585  | 65528687  | L1PA5:L1:LINE    | 67.51322061 | -2.137064242 | 0.573106227 | -3.728914715 | 0.000192306 | 0.011869398 |
| 14 | 66701365  | 66707789  | L1PA8A:L1:LINE   | 37.12158838 | -2.000023987 | 0.589478202 | -3.39287183  | 0.00069164  | 0.029302027 |
| 14 | 65632981  | 65634580  | SVA_D:SVA:Retrop | 182.8006542 | -1.572652038 | 0.452109909 | -3.478472837 | 0.00050428  | 0.023872272 |
| 14 | 34546713  | 34546877  | U1:snRNA:snRNA   | 2792.545534 | -2.4831681   | 0.6191897   | -4.010351107 | 6.06E-05    | 0.005090025 |
| 14 | 34556225  | 34556389  | U1:snRNA:snRNA   | 2540.895852 | -2.671157037 | 0.624379978 | -4.278095282 | 1.88E-05    | 0.002087597 |
| 15 | 89200800  | 89201095  | AluSq:Alu:SINE   | 54.14279311 | 1.826053139  | 0.44207961  | 4.130597968  | 3.62E-05    | 0.003383242 |
| 15 | 61912917  | 61913284  | L1PA8A:L1:LINE   | 7.698668043 | -2.64441487  | 0.803210451 | -3.292306353 | 0.000993693 | 0.03752603  |
| 15 | 89196302  | 89196472  | MIR3:MIR:SINE    | 76.16713526 | 1.834650304  | 0.43625429  | 4.205460773  | 2.61E-05    | 0.002616483 |
| 15 | 89198595  | 89198679  | MIR3:MIR:SINE    | 39.04401034 | 1.911649228  | 0.513012759 | 3.72631907   | 0.000194296 | 0.011874896 |
| 15 | 89200250  | 89200502  | SVA_F:SVA:Retrop | 131.0737153 | 2.091885195  | 0.442393442 | 4.728562853  | 2.26E-06    | 0.000403531 |
| 16 | 9110767   | 9111055   | AluSp:Alu:SINE   | 44.76850245 | 1.628672823  | 0.470427814 | 3.462109962  | 0.000535958 | 0.024889678 |
| 16 | 71567127  | 71567437  | AluSx:Alu:SINE   | 10.61955485 | 2.589543317  | 0.764063597 | 3.389172481  | 0.000701039 | 0.029425405 |
| 16 | 20310748  | 20311056  | AluSx1:Alu:SINE  | 48.0182916  | -3.097081537 | 0.660092051 | -4.691893398 | 2.71E-06    | 0.000452078 |
| 16 | 8783193   | 8783543   | L2c:L2:LINE      | 78.05722928 | 1.492882269  | 0.392433277 | 3.804168395  | 0.000142281 | 0.009556106 |
| 16 | 71588846  | 71590265  | SVA_D:SVA:Retrop | 8.985709468 | 2.939944893  | 0.781959623 | 3.75971445   | 0.000170107 | 0.010890681 |

|    |          |          |                  |             |              |             |              |             |             |
|----|----------|----------|------------------|-------------|--------------|-------------|--------------|-------------|-------------|
| 17 | 42403073 | 42403228 | AluJr:Alu:SINE   | 59.23288232 | 2.574460523  | 0.709837657 | 3.626830021  | 0.000286922 | 0.015486364 |
| 17 | 44019706 | 44020376 | HERVL66-int:ERVL | 22.32586283 | -3.102738764 | 0.827169587 | -3.751030999 | 0.000176109 | 0.01113372  |
| 17 | 44019061 | 44019706 | LTR66:ERVL:LTR   | 10.31047111 | -2.660468427 | 0.83734575  | -3.177263905 | 0.001486717 | 0.049209104 |
| 17 | 32941260 | 32941516 | MER102a:hAT-Cha  | 47.16195639 | 1.760999298  | 0.51496209  | 3.419667842  | 0.000626976 | 0.027508592 |
| 17 | 43239924 | 43240111 | U2:snRNA:snRNA   | 7.57264295  | -2.882391393 | 0.825795844 | -3.490440662 | 0.000482225 | 0.023280324 |
| 17 | 43273104 | 43273292 | U2:snRNA:snRNA   | 9.774369169 | 3.905657265  | 0.837750004 | 4.662079675  | 3.13E-06    | 0.000511845 |
| 18 | 35897480 | 35903637 | L1PA4:L1:LINE    | 7.709415278 | -2.681314191 | 0.834571689 | -3.21280272  | 0.001314465 | 0.045211531 |
| 19 | 13834729 | 13834886 | AluJr:Alu:SINE   | 36.20543399 | -2.174224251 | 0.546066743 | -3.981608984 | 6.85E-05    | 0.005538269 |
| 19 | 13835344 | 13835653 | AluSx:Alu:SINE   | 45.93234369 | -2.42354079  | 0.531029251 | -4.56385554  | 5.02E-06    | 0.000743367 |
| 19 | 13834886 | 13835207 | AluSx1:Alu:SINE  | 48.019372   | -1.915617089 | 0.507988776 | -3.770983102 | 0.000162606 | 0.010579871 |
| 19 | 13837775 | 13838087 | AluSx1:Alu:SINE  | 61.34179426 | -2.386778966 | 0.462315402 | -5.162663744 | 2.43E-07    | 6.18E-05    |
| 19 | 44751589 | 44751889 | AluSx1:Alu:SINE  | 13.34869886 | -2.410112156 | 0.739527636 | -3.258988628 | 0.001118101 | 0.040416004 |
| 19 | 20154965 | 20156337 | HERVH-int:ERV1:L | 10.43277326 | -2.854366794 | 0.83074237  | -3.435922972 | 0.000590539 | 0.026498734 |
| 19 | 15056138 | 15056368 | L3:CR1:LINE      | 19.1785401  | -2.692969688 | 0.830533891 | -3.24245611  | 0.001185042 | 0.042248912 |
| 19 | 2715361  | 2715715  | MLT1E1A:ERVL-M   | 22.09887453 | 2.326917848  | 0.675918664 | 3.442600377  | 0.00057615  | 0.02608631  |
| 19 | 11676262 | 11677933 | SVA_B:SVA:Retro  | 118.3803529 | -2.557136018 | 0.633980131 | -4.033463972 | 5.50E-05    | 0.004767986 |
| 20 | 58678370 | 58678657 | AluSg:Alu:SINE   | 139.5574151 | -1.461369652 | 0.390174933 | -3.745421676 | 0.000180091 | 0.011316746 |
| 20 | 51634574 | 51634869 | AluSp:Alu:SINE   | 12.94866653 | -2.517042523 | 0.701649294 | -3.587322819 | 0.000334091 | 0.017551188 |
| 20 | 63953098 | 63953408 | AluSp:Alu:SINE   | 16.79128395 | -2.265032704 | 0.666036638 | -3.400762922 | 0.000671981 | 0.029067358 |
| 20 | 51632845 | 51633153 | AluSx1:Alu:SINE  | 23.12617093 | -3.278173011 | 0.666480922 | -4.918629932 | 8.72E-07    | 0.000183909 |
| 20 | 62806260 | 62806496 | AluSx1:Alu:SINE  | 40.89432561 | -1.804377591 | 0.513327032 | -3.515064427 | 0.000439647 | 0.021794643 |
| 20 | 14806154 | 14812579 | L1PA7:L1:LINE    | 21.73196166 | -2.135173698 | 0.582936771 | -3.66278781  | 0.000249485 | 0.014039049 |
| 20 | 62366948 | 62367030 | LTR35B:ERV1:LTR  | 43.8451593  | -2.079841558 | 0.531022505 | -3.916673093 | 8.98E-05    | 0.006723979 |
| 20 | 63659689 | 63660674 | LTR5B:ERVK:LTR   | 91.33782717 | -1.680973987 | 0.458319302 | -3.667691887 | 0.00024475  | 0.013923102 |
| 20 | 63529149 | 63529330 | MER31-int:ERV1:L | 123.0404042 | -1.360614756 | 0.35900537  | -3.789956555 | 0.000150674 | 0.010005592 |
| 20 | 38129160 | 38129333 | MIR3:MIR:SINE    | 170.9386726 | 2.102296032  | 0.620633318 | 3.387339949  | 0.000705739 | 0.029491397 |
| 21 | 8232170  | 8232399  | AluSx1:Alu:SINE  | 25.14175561 | 4.500803512  | 0.722838817 | 6.226565878  | 4.77E-10    | 2.71E-07    |
| 21 | 8235599  | 8235801  | AluSx1:Alu:SINE  | 7.948299849 | 3.587598948  | 0.824943901 | 4.348900508  | 1.37E-05    | 0.001605796 |
| 21 | 8414762  | 8414991  | AluSx1:Alu:SINE  | 21.66382878 | 4.356759233  | 0.720803381 | 6.044310206  | 1.50E-09    | 7.32E-07    |
| 21 | 8418002  | 8418204  | AluSx1:Alu:SINE  | 7.948299849 | 3.587598948  | 0.824943901 | 4.348900508  | 1.37E-05    | 0.001605796 |
| 21 | 8462565  | 8462767  | AluSx1:Alu:SINE  | 7.948299849 | 3.587598948  | 0.824943901 | 4.348900508  | 1.37E-05    | 0.001605796 |
| 21 | 8414175  | 8414470  | AluSz:Alu:SINE   | 10.97579738 | 4.104725228  | 0.803066472 | 5.111314405  | 3.20E-07    | 7.81E-05    |
| 21 | 8458737  | 8459032  | AluSz:Alu:SINE   | 10.97579738 | 4.104725228  | 0.803066472 | 5.111314405  | 3.20E-07    | 7.81E-05    |
| 21 | 14326861 | 14332307 | L1P3:L1:LINE     | 17.68367056 | 4.435237391  | 0.770167882 | 5.758792979  | 8.47E-09    | 3.44E-06    |

|    |           |           |                  |             |              |             |              |             |             |
|----|-----------|-----------|------------------|-------------|--------------|-------------|--------------|-------------|-------------|
| 21 | 14933877  | 14939951  | L1PA5:L1:LINE    | 138.9847068 | -2.255996823 | 0.674715511 | -3.34362674  | 0.000826909 | 0.032773095 |
| 21 | 8397806   | 8401980   | LSU-rRNA_Hsa:rRN | 863.1896273 | -2.470417715 | 0.568152077 | -4.348162779 | 1.37E-05    | 0.001605796 |
| 22 | 42557273  | 42557585  | AluSp:Alu:SINE   | 16.86115214 | -3.219224539 | 0.755940058 | -4.258571171 | 2.06E-05    | 0.002238813 |
| 22 | 42564427  | 42564730  | AluSq2:Alu:SINE  | 19.77992497 | -2.919596341 | 0.709304168 | -4.116141528 | 3.85E-05    | 0.003570415 |
| 22 | 42567747  | 42568029  | AluSq2:Alu:SINE  | 21.4644437  | -2.930775847 | 0.754336346 | -3.885237483 | 0.00010223  | 0.007477148 |
| 22 | 42559799  | 42560114  | AluSx:Alu:SINE   | 10.61615444 | -2.624291699 | 0.808773833 | -3.244778195 | 0.001175421 | 0.042001815 |
| 22 | 42571478  | 42571721  | AluSx1:Alu:SINE  | 328.263528  | -3.625303857 | 0.426190365 | -8.506301767 | 1.80E-17    | 5.10E-14    |
| 22 | 42572751  | 42572969  | AluSx1:Alu:SINE  | 35.32791595 | -2.13884028  | 0.543280665 | -3.936897477 | 8.25E-05    | 0.006302847 |
| 22 | 42568690  | 42568922  | AluSz:Alu:SINE   | 12.17674532 | -2.713347932 | 0.807429006 | -3.360478646 | 0.000778075 | 0.031517606 |
| 22 | 42573243  | 42573559  | AluY:Alu:SINE    | 88.86252843 | -2.288026061 | 0.5468844   | -4.183747169 | 2.87E-05    | 0.002842943 |
| 22 | 42567382  | 42567700  | AluYb8:Alu:SINE  | 19.49142013 | -2.59885685  | 0.790164668 | -3.289006653 | 0.001005416 | 0.037828944 |
| 22 | 42571722  | 42572117  | L1MB7:L1:LINE    | 197.124559  | -3.344640637 | 0.468561408 | -7.138105234 | 9.46E-13    | 8.96E-10    |
| 22 | 42502097  | 42502196  | MIR3:MIR:SINE    | 29.41014159 | -2.738561363 | 0.628891314 | -4.354586082 | 1.33E-05    | 0.001601413 |
| 22 | 42555410  | 42555509  | MIR3:MIR:SINE    | 29.41014159 | -2.738561363 | 0.628891314 | -4.354586082 | 1.33E-05    | 0.001601413 |
| 22 | 42570794  | 42570947  | MLT1J1:ERVL-MaL  | 81.22358269 | -2.568220926 | 0.584233076 | -4.395884166 | 1.10E-05    | 0.001400606 |
| 22 | 40501391  | 40501853  | SVA_F:SVA:Retrop | 18.621571   | -2.975499386 | 0.792174166 | -3.756117675 | 0.00017257  | 0.010999601 |
| X  | 146145594 | 146145903 | AluSz:Alu:SINE   | 13.85748992 | -2.460812233 | 0.767430122 | -3.206561957 | 0.001343314 | 0.045650742 |
| X  | 25882278  | 25885802  | L1P2:L1:LINE     | 18.11778049 | -2.113842478 | 0.643287523 | -3.285999501 | 0.001016212 | 0.038038501 |
| X  | 104826133 | 104829583 | L1P3:L1:LINE     | 8.717254028 | -2.454680029 | 0.771880888 | -3.180128006 | 0.0014721   | 0.04896183  |
| X  | 104672099 | 104678122 | L1PA2:L1:LINE    | 28.83214905 | -4.376787167 | 0.766645126 | -5.709013229 | 1.14E-08    | 4.38E-06    |
| X  | 104904301 | 104910378 | L1PA2:L1:LINE    | 20.3590916  | -3.973731554 | 0.783008806 | -5.074951296 | 3.88E-07    | 9.03E-05    |
| X  | 105041515 | 105043241 | L1PA3:L1:LINE    | 11.11015817 | -3.293246161 | 0.810382866 | -4.063815141 | 4.83E-05    | 0.004283355 |
| X  | 85320258  | 85323630  | L1PA3:L1:LINE    | 54.36324137 | -1.913881797 | 0.591605816 | -3.235062513 | 0.001216161 | 0.04321038  |
| X  | 105029253 | 105035391 | L1PA4:L1:LINE    | 10.84547984 | -3.292398146 | 0.809989646 | -4.064741026 | 4.81E-05    | 0.004278542 |
| X  | 105073045 | 105079149 | L1PA4:L1:LINE    | 8.41918773  | -2.890244045 | 0.826777433 | -3.49579455  | 0.000472652 | 0.022957091 |
| X  | 129240861 | 129246997 | L1PA4:L1:LINE    | 13.77373636 | -2.649449045 | 0.703435625 | -3.766441379 | 0.000165591 | 0.010707186 |
| X  | 25772423  | 25775961  | L1PA4:L1:LINE    | 9.502068122 | -3.024454923 | 0.82194505  | -3.679631534 | 0.000233571 | 0.013434    |
| X  | 104846199 | 104848241 | L1PA5:L1:LINE    | 8.56010707  | -2.95254377  | 0.824050774 | -3.582963407 | 0.000339718 | 0.01771242  |
| X  | 104889804 | 104895934 | L1PA5:L1:LINE    | 17.02765458 | -4.067569022 | 0.771604402 | -5.271573118 | 1.35E-07    | 3.58E-05    |
| X  | 105684062 | 105690225 | L1PA6:L1:LINE    | 8.322856514 | -2.865048707 | 0.827591155 | -3.461913154 | 0.00053635  | 0.024889678 |
| X  | 104602037 | 104608348 | L1PA7:L1:LINE    | 10.75059263 | -2.686008892 | 0.836597669 | -3.210633966 | 0.001324425 | 0.045449684 |
| X  | 129419635 | 129423210 | L1PA7:L1:LINE    | 23.43093723 | -2.379949763 | 0.705256715 | -3.374586463 | 0.000739267 | 0.030379005 |
| X  | 94481142  | 94483200  | L1PA8A:L1:LINE   | 11.65685318 | -3.500431611 | 0.799381567 | -4.3789246   | 1.19E-05    | 0.001489098 |
| Y  | 24776006  | 24782046  | L1PA2:L1:LINE    | 8.183513625 | -2.69393479  | 0.834642117 | -3.227652588 | 0.001248105 | 0.043699051 |

Supplemental Table S5. Location of differentially expressed mobile elements that overlap differentially expressed genes.

| Chr  | Start     | End       |
|------|-----------|-----------|
| chr1 | 109203930 | 109204222 |
| chr1 | 109206011 | 109206314 |
| chr1 | 109203594 | 109203905 |
| chr1 | 108578637 | 108579660 |
| chr1 | 197508889 | 197509568 |
| chr1 | 108576306 | 108578640 |
| chr1 | 109176604 | 109177644 |
| chr2 | 99548467  | 99548746  |
| chr2 | 212372467 | 212372778 |
| chr2 | 212514524 | 212514805 |
| chr2 | 100001412 | 100001726 |
| chr2 | 99700123  | 99700418  |
| chr2 | 100082798 | 100083115 |
| chr2 | 99824120  | 99824414  |
| chr2 | 99929110  | 99929357  |
| chr2 | 100062968 | 100063273 |
| chr2 | 100038710 | 100039023 |
| chr2 | 212496898 | 212497197 |
| chr2 | 99839116  | 99839409  |
| chr2 | 99993792  | 99994105  |
| chr2 | 102176983 | 102177271 |
| chr2 | 99549302  | 99549592  |
| chr2 | 99724267  | 99724572  |
| chr2 | 100057042 | 100057344 |
| chr2 | 100058970 | 100059279 |
| chr2 | 154857598 | 154857936 |
| chr2 | 99931626  | 99931915  |
| chr2 | 99958209  | 99958500  |
| chr2 | 99991620  | 99991927  |
| chr2 | 100010993 | 100011286 |
| chr2 | 100078939 | 100079245 |
| chr2 | 131624093 | 131624426 |
| chr2 | 167999451 | 167999761 |
| chr2 | 212446989 | 212447296 |
| chr2 | 212483746 | 212484035 |
| chr2 | 212513530 | 212513839 |
| chr2 | 99871925  | 99872232  |
| chr2 | 99873892  | 99874191  |
| chr2 | 99891828  | 99892121  |
| chr2 | 99985918  | 99986201  |
| chr2 | 99995379  | 99995660  |
| chr2 | 212206586 | 212206887 |
| chr2 | 212440548 | 212446198 |
| chr2 | 99773691  | 99775704  |

|      |           |           |
|------|-----------|-----------|
| chr2 | 99626574  | 99628545  |
| chr2 | 211888536 | 211894571 |
| chr2 | 131613928 | 131617597 |
| chr2 | 99739814  | 99741137  |
| chr2 | 99954339  | 99954925  |
| chr2 | 99908220  | 99909403  |
| chr2 | 154767186 | 154769784 |
| chr2 | 154838950 | 154845084 |
| chr2 | 168100710 | 168101366 |
| chr2 | 212234004 | 212237135 |
| chr2 | 212237134 | 212238540 |
| chr2 | 212274815 | 212275555 |
| chr2 | 99829200  | 99830299  |
| chr2 | 99933334  | 99933819  |
| chr2 | 100025210 | 100026690 |
| chr2 | 154857401 | 154857585 |
| chr2 | 99940301  | 99940854  |
| chr2 | 26780450  | 26780632  |
| chr2 | 212440122 | 212440548 |
| chr2 | 212459913 | 212460266 |
| chr2 | 99927822  | 99928194  |
| chr2 | 168080643 | 168081664 |
| chr2 | 212460266 | 212461716 |
| chr2 | 212466712 | 212468298 |
| chr2 | 212505908 | 212508318 |
| chr3 | 23266649  | 23269368  |
| chr3 | 23349243  | 23355385  |
| chr3 | 23296317  | 23301810  |
| chr3 | 55831626  | 55837762  |
| chr3 | 56213069  | 56219149  |
| chr3 | 187052299 | 187058423 |
| chr3 | 23347104  | 23347712  |
| chr4 | 89239666  | 89239961  |
| chr4 | 95171232  | 95177256  |
| chr4 | 95480626  | 95483004  |
| chr4 | 38824163  | 38824458  |
| chr4 | 75047494  | 75047704  |
| chr5 | 95794820  | 95795118  |
| chr5 | 15813202  | 15814587  |
| chr5 | 15870695  | 15872406  |
| chr5 | 15872433  | 15876411  |
| chr5 | 151661901 | 151662129 |
| chr5 | 151661681 | 151661886 |
| chr5 | 15743104  | 15744696  |
| chr6 | 87086803  | 87087087  |
| chr6 | 115935045 | 115941505 |
| chr7 | 17345034  | 17345326  |

|       |           |           |
|-------|-----------|-----------|
| chr7  | 17310536  | 17310835  |
| chr7  | 17344621  | 17344927  |
| chr7  | 17324520  | 17324815  |
| chr7  | 8461548   | 8461858   |
| chr7  | 8672103   | 8672480   |
| chr7  | 8726340   | 8732368   |
| chr7  | 8496881   | 8497980   |
| chr7  | 8732890   | 8734564   |
| chr7  | 8734830   | 8739610   |
| chr7  | 131503890 | 131504051 |
| chr7  | 8524931   | 8526510   |
| chr8  | 132674608 | 132674905 |
| chr8  | 103602996 | 103609018 |
| chr8  | 103783269 | 103789216 |
| chr8  | 103751167 | 103756353 |
| chr8  | 103549090 | 103553602 |
| chr8  | 103738312 | 103739541 |
| chr8  | 103790883 | 103795584 |
| chr8  | 103951313 | 103957769 |
| chr8  | 127947602 | 127947679 |
| chr8  | 123209795 | 123210136 |
| chr8  | 103562119 | 103563698 |
| chr9  | 63818917  | 63819225  |
| chr9  | 41149958  | 41155994  |
| chr9  | 99865852  | 99866047  |
| chr11 | 73297944  | 73298234  |
| chr11 | 125089312 | 125090854 |
| chr11 | 73272218  | 73272327  |
| chr12 | 101185569 | 101185870 |
| chr12 | 119179222 | 119179304 |
| chr12 | 52168981  | 52169353  |
| chr13 | 97358238  | 97358429  |
| chr15 | 89200800  | 89201095  |
| chr15 | 89196302  | 89196472  |
| chr15 | 89198595  | 89198679  |
| chr15 | 89200250  | 89200502  |
| chr16 | 20310748  | 20311056  |
| chr16 | 8783193   | 8783543   |
| chr17 | 42403073  | 42403228  |
| chr17 | 44019706  | 44020376  |
| chr17 | 44019061  | 44019706  |
| chr19 | 13834729  | 13834886  |
| chr19 | 13835344  | 13835653  |
| chr19 | 13834886  | 13835207  |
| chr19 | 13837775  | 13838087  |
| chr19 | 2715361   | 2715715   |
| chr19 | 11676262  | 11677933  |



|       |           |           |
|-------|-----------|-----------|
| chr20 | 63953098  | 63953408  |
| chr20 | 62806260  | 62806496  |
| chr20 | 62366948  | 62367030  |
| chr20 | 63659689  | 63660674  |
| chr20 | 63529149  | 63529330  |
| chr20 | 38129160  | 38129333  |
| chr22 | 42557273  | 42557585  |
| chr22 | 42564427  | 42564730  |
| chr22 | 42567747  | 42568029  |
| chr22 | 42559799  | 42560114  |
| chr22 | 42571478  | 42571721  |
| chr22 | 42572751  | 42572969  |
| chr22 | 42568690  | 42568922  |
| chr22 | 42573243  | 42573559  |
| chr22 | 42567382  | 42567700  |
| chr22 | 42571722  | 42572117  |
| chr22 | 42555410  | 42555509  |
| chr22 | 42570794  | 42570947  |
| chrX  | 104826133 | 104829583 |
| chrX  | 104672099 | 104678122 |
| chrX  | 104904301 | 104910378 |
| chrX  | 105041515 | 105043241 |
| chrX  | 85320258  | 85323630  |
| chrX  | 105029253 | 105035391 |
| chrX  | 105073045 | 105079149 |
| chrX  | 104846199 | 104848241 |
| chrX  | 104889804 | 104895934 |
| chrX  | 105684062 | 105690225 |
| chrX  | 104602037 | 104608348 |

Supplemental Table S6. Mobile elements with expression changes that overlap regulatory regions.

| chr | start     | end       | Regulatory Region        | Status in Mammary Tissue | Mobile Element       |
|-----|-----------|-----------|--------------------------|--------------------------|----------------------|
| 1   | 108535430 | 108535937 | promoter_flanking_region | Inactive                 | SVA_D:SVA:Retroposon |
| 1   | 108536345 | 108536526 | open_chromatin_region    | Inactive                 | SVA_D:SVA:Retroposon |
| 1   | 109177402 | 109178600 | promoter_flanking_region | Inactive                 | SVA_D:SVA:Retroposon |
| 2   | 94497425  | 94497666  | open_chromatin_region    | Inactive                 | L1PA2:L1:LINE        |
| 2   | 94498792  | 94498999  | open_chromatin_region    | Inactive                 | L1PA2:L1:LINE        |
| 2   | 99765202  | 99778000  | promoter_flanking_region | Poised                   | L1PA11:L1:LINE       |
| 2   | 99874001  | 99874200  | CTCF_binding_site        | Repressed                | AluY:Alu:SINE        |
| 2   | 99927402  | 99929999  | promoter_flanking_region | Active                   | AluSp:Alu:SINE       |
| 2   | 99984601  | 99987800  | promoter_flanking_region | Inactive                 | AluY:Alu:SINE        |
| 2   | 100057201 | 100057800 | enhancer                 | Inactive                 | AluSx1:Alu:SINE      |
| 2   | 100059202 | 100061600 | promoter_flanking_region | Inactive                 | AluSx1:Alu:SINE      |
| 2   | 101096602 | 101098800 | promoter_flanking_region | Inactive                 | L1PA8A:L1:LINE       |
| 2   | 131624401 | 131624600 | CTCF_binding_site        | Inactive                 | AluY:Alu:SINE        |
| 2   | 131633001 | 131633200 | CTCF_binding_site        | Inactive                 | L1PA13:L1:LINE       |
| 2   | 132529264 | 132529453 | open_chromatin_region    | Inactive                 | L1PA4:L1:LINE        |
| 2   | 211889201 | 211889400 | CTCF_binding_site        | Inactive                 | L1PA2:L1:LINE        |
| 2   | 212237401 | 212237600 | CTCF_binding_site        | Repressed                | L1PA7:L1:LINE        |
| 2   | 212237401 | 212238400 | enhancer                 | Repressed                | L1PA7:L1:LINE        |
| 3   | 23297434  | 23297761  | open_chromatin_region    | Inactive                 | L1PA4:L1:LINE        |
| 3   | 23349801  | 23350000  | CTCF_binding_site        | Inactive                 | L1PA3:L1:LINE        |
| 3   | 53366128  | 53366459  | open_chromatin_region    | Inactive                 | L1PA2:L1:LINE        |
| 3   | 53366201  | 53366400  | CTCF_binding_site        | Inactive                 | L1PA2:L1:LINE        |
| 3   | 125855069 | 125855323 | open_chromatin_region    | Repressed                | L1PA4:L1:LINE        |
| 3   | 141759950 | 141760368 | open_chromatin_region    | Inactive                 | L1PA2:L1:LINE        |
| 3   | 141760001 | 141760200 | CTCF_binding_site        | Inactive                 | L1PA2:L1:LINE        |
| 3   | 187049801 | 187052400 | promoter_flanking_region | Inactive                 | L1PA2:L1:LINE        |
| 3   | 187057771 | 187058136 | open_chromatin_region    | Inactive                 | L1PA2:L1:LINE        |
| 3   | 189023401 | 189023600 | CTCF_binding_site        | Repressed                | L1PA3:L1:LINE        |
| 4   | 4019001   | 4019400   | CTCF_binding_site        | Repressed                | L1PA4:L1:LINE        |
| 4   | 4019094   | 4019312   | CTCF_binding_site        | Repressed                | L1PA4:L1:LINE        |
| 4   | 9080889   | 9081268   | open_chromatin_region    | Repressed                | L1PA4:L1:LINE        |
| 4   | 39501002  | 39503048  | promoter_flanking_region | Inactive                 | AluSg:Alu:SINE       |
| 4   | 74444600  | 74449401  | promoter                 | Inactive                 | L1MEf:L1:LINE        |
| 4   | 95139362  | 95139648  | open_chromatin_region    | Inactive                 | L1PA5:L1:LINE        |
| 4   | 95139401  | 95139600  | CTCF_binding_site        | Inactive                 | L1PA5:L1:LINE        |
| 4   | 140710202 | 140712800 | promoter_flanking_region | Inactive                 | AluSx3:Alu:SINE      |
| 4   | 150963201 | 150963400 | CTCF_binding_site        | Inactive                 | SVA_B:SVA:Retroposon |
| 4   | 150964601 | 150965200 | enhancer                 | Inactive                 | SVA_B:SVA:Retroposon |
| 5   | 43665253  | 43665750  | open_chromatin_region    | Inactive                 | SVA_B:SVA:Retroposon |
| 5   | 43666217  | 43666380  | open_chromatin_region    | Inactive                 | SVA_B:SVA:Retroposon |
| 6   | 31869001  | 31869800  | promoter_flanking_region | Inactive                 | AluY:Alu:SINE        |
| 6   | 53306001  | 53306200  | CTCF_binding_site        | Inactive                 | SVA_D:SVA:Retroposon |
| 6   | 71360801  | 71361200  | CTCF_binding_site        | Inactive                 | L1PA7:L1:LINE        |
| 6   | 151863062 | 151863273 | open_chromatin_region    | Repressed                | L1PA5:L1:LINE        |
| 6   | 151867475 | 151867710 | open_chromatin_region    | Inactive                 | L1PA5:L1:LINE        |

|    |           |           |                          |           |                      |
|----|-----------|-----------|--------------------------|-----------|----------------------|
| 7  | 65480601  | 65481000  | CTCF_binding_site        | Repressed | L1PA4:L1:LINE        |
| 7  | 65480649  | 65480860  | open_chromatin_region    | Repressed | L1PA4:L1:LINE        |
| 8  | 103783445 | 103783667 | open_chromatin_region    | Repressed | L1PA2:L1:LINE        |
| 8  | 103795201 | 103797200 | CTCF_binding_site        | Active    | L1PA5:L1:LINE        |
| 8  | 103795513 | 103795863 | TF_binding_site          | Inactive  | L1PA5:L1:LINE        |
| 8  | 127934601 | 127939399 | promoter_flanking_region | Inactive  | AluSg:Alu:SINE       |
| 8  | 127943402 | 127953200 | promoter_flanking_region | Active    | AluY:Alu:SINE        |
| 8  | 128013802 | 128015399 | promoter_flanking_region | Inactive  | AluS26:Alu:SINE      |
| 8  | 128057602 | 128071600 | promoter_flanking_region | Active    | AluS2:Alu:SINE       |
| 8  | 132674400 | 132676401 | promoter                 | Inactive  | AluSx:Alu:SINE       |
| 8  | 133496600 | 133500601 | promoter                 | Inactive  | AluSx1:Alu:SINE      |
| 8  | 133536402 | 133542399 | promoter_flanking_region | Inactive  | AluSx1:Alu:SINE      |
| 9  | 41155351  | 41155743  | open_chromatin_region    | Inactive  | L1PA3:L1:LINE        |
| 9  | 63811801  | 63819201  | promoter                 | Active    | AluSq:Alu:SINE       |
| 9  | 68275557  | 68276003  | open_chromatin_region    | Inactive  | L1PA3:L1:LINE        |
| 9  | 86160686  | 86160855  | open_chromatin_region    | Repressed | L1PA2:L1:LINE        |
| 10 | 77820337  | 77820764  | open_chromatin_region    | Inactive  | AluSx1:Alu:SINE      |
| 12 | 48915168  | 48915389  | open_chromatin_region    | Repressed | SVA_D:SVA:Retroposon |
| 12 | 48915564  | 48915780  | open_chromatin_region    | Repressed | SVA_D:SVA:Retroposon |
| 12 | 100293647 | 100293844 | TF_binding_site          | Inactive  | SVA_D:SVA:Retroposon |
| 12 | 100295401 | 100295600 | CTCF_binding_site        | Inactive  | SVA_D:SVA:Retroposon |
| 13 | 49124401  | 49130600  | promoter_flanking_region | Inactive  | L1PA7:L1:LINE        |
| 13 | 49161171  | 49161452  | open_chromatin_region    | Inactive  | L1P2:L1:LINE         |
| 13 | 96331201  | 96331400  | enhancer                 | Inactive  | L1PA4:L1:LINE        |
| 14 | 65633318  | 65633524  | TF_binding_site          | Inactive  | SVA_D:SVA:Retroposon |
| 14 | 65634190  | 65634544  | open_chromatin_region    | Inactive  | SVA_D:SVA:Retroposon |
| 15 | 89195001  | 89200599  | promoter_flanking_region | Active    | SVA_F:SVA:Retroposon |
| 15 | 89200801  | 89201000  | promoter_flanking_region | Inactive  | AluSq:Alu:SINE       |
| 17 | 42398001  | 42405200  | promoter_flanking_region | Inactive  | AluJr:Alu:SINE       |
| 17 | 42402801  | 42403800  | CTCF_binding_site        | Inactive  | AluJr:Alu:SINE       |
| 19 | 44744800  | 44751601  | promoter                 | Active    | AluSx1:Alu:SINE      |
| 20 | 62802600  | 62807001  | promoter                 | Inactive  | AluSx1:Alu:SINE      |
| 20 | 63953000  | 63953601  | promoter                 | Repressed | AluSp:Alu:SINE       |
| 21 | 8235401   | 8236000   | CTCF_binding_site        | Poised    | AluSx1:Alu:SINE      |
| 21 | 8417801   | 8418800   | CTCF_binding_site        | Poised    | AluSx1:Alu:SINE      |
| 21 | 8462401   | 8463200   | CTCF_binding_site        | Poised    | AluSx1:Alu:SINE      |
| X  | 25882401  | 25882800  | enhancer                 | Repressed | L1P2:L1:LINE         |
| X  | 94483001  | 94483200  | CTCF_binding_site        | Repressed | L1PA8A:L1:LINE       |
| X  | 104889547 | 104889834 | open_chromatin_region    | Repressed | L1PA5:L1:LINE        |
| X  | 104908822 | 104908966 | open_chromatin_region    | Repressed | L1PA2:L1:LINE        |
| X  | 105034601 | 105035000 | CTCF_binding_site        | Inactive  | L1PA4:L1:LINE        |
| X  | 105684697 | 105684815 | TF_binding_site          | Repressed | L1PA6:L1:LINE        |

Supplemental Table S7. Table showing the primer sets used to amplify the L1 and *Alu* insertions identified in Patient 2.

| Primer         | Sequence                 |            |
|----------------|--------------------------|------------|
| Forward Primer | CCCAAAGGACTATAAATCATGCTG | L1         |
| Reverse Primer | CAAGACCAATCTCGTGCTACT    | L1         |
|                |                          |            |
| Forward Primer | GATCTCGGCTCACTGCAAG      | <i>Alu</i> |
| Reverse Primer | AGCCACTGGGTTAGAAAGCA     | <i>Alu</i> |
